# Supplementary material for: Bioactive Terphenyls Isolated from the Antarctic Lichen Stereocaulon alpinum
Source: MDPI journal article supplement (doi:10.3390/molecules27072363), 2022-04-06
Supplement: s1 [file s1]

# **Bioactive Terphenyls Isolated from the Antarctic lichen *Stereocaulon alpinum***

Kim-Hoa Phi <sup>a,b</sup>, Min-Ji Shin, <sup>c,d</sup> Seulah Lee <sup>e</sup>, Jae Eun So <sup>a,b</sup>, Ji Hee Kim <sup>a</sup>, Sung-Suk Suh <sup>c</sup>,  
Man Hyung Koo <sup>f</sup>, Seung Chul Shin, <sup>a</sup> Jin-Hyoung Kim, <sup>a,b</sup> Jun Hyuck Lee <sup>b,f</sup> and Ui Joung  
Youn <sup>a,b,\*</sup>

<sup>a</sup> Division of Life Sciences, Korea Polar Research Institute, Incheon 21990, Republic of Korea

<sup>b</sup> Department of Polar Sciences, University of Science and Technology, Incheon 21990, Republic of Korea

<sup>c</sup> Department of Bioscience, Mokpo National University, Joennam 58554, Republic of Korea

<sup>d</sup> Department of Biomedicine, Health & Life Convergence Science, BK21 Four, Mokpo National University, Joennam 58554, Republic of Korea

<sup>e</sup> Seoul School of Integrated Sciences & Technologies (aSSIST), Seoul 03767, Republic of Korea

<sup>f</sup> Research Unit of Cryogenic Novel Material, Korea Polar Research Institute, Incheon 21990, Republic of Korea

\*Correspondence: [ujyoun@kopri.re.kr](mailto:ujyoun@kopri.re.kr); Tel.: +82-32-760-5562

Correspondence to:

TEL: +82-32-760-5562; FAX: +82-32-760-5509; E-mail: [ujyoun@kopri.re.kr](mailto:ujyoun@kopri.re.kr)

## Table of Contents

|                                                                                                                     |           |
|---------------------------------------------------------------------------------------------------------------------|-----------|
| <b>Figure S1.</b> $^1\text{H}$ NMR spectrum of compound <b>1</b> in chloroform- <i>d</i> (600 MHz) .....            | <b>3</b>  |
| <b>Figure S2.</b> $^{13}\text{C}$ NMR spectrum of compound <b>1</b> in chloroform- <i>d</i> (150 MHz) .....         | <b>4</b>  |
| <b>Figure S3.</b> HR-EIMS positive spectrum of compound <b>2</b> .....                                              | <b>5</b>  |
| <b>Figure S4.</b> $^1\text{H}$ NMR spectrum of compound <b>2</b> in chloroform- <i>d</i> (600 MHz) .....            | <b>6</b>  |
| <b>Figure S5.</b> $^{13}\text{C}$ NMR spectrum of compound <b>2</b> in chloroform- <i>d</i> (150 MHz) .....         | <b>7</b>  |
| <b>Figure S6.</b> HSQC NMR spectrum of compound <b>2</b> in chloroform- <i>d</i> (600 MHz) .....                    | <b>8</b>  |
| <b>Figure S7.</b> COSY NMR spectrum of compound <b>2</b> in chloroform- <i>d</i> (600 MHz) .....                    | <b>9</b>  |
| <b>Figure S8.</b> HMBC NMR spectrum of compound <b>2</b> in chloroform- <i>d</i> (600 MHz) .....                    | <b>10</b> |
| <b>Figure S9.</b> HR-EIMS positive spectrum of compound <b>3</b> .....                                              | <b>11</b> |
| <b>Figure S10.</b> $^1\text{H}$ NMR spectrum of compound <b>3</b> in chloroform- <i>d</i> (600 MHz) .....           | <b>12</b> |
| <b>Figure S11.</b> $^{13}\text{C}$ NMR spectrum of compound <b>3</b> in chloroform- <i>d</i> (150 MHz).....         | <b>13</b> |
| <b>Figure S12.</b> HSQC NMR spectrum of compound <b>3</b> in chloroform- <i>d</i> (600 MHz) .....                   | <b>14</b> |
| <b>Figure S13.</b> COSY NMR spectrum of compound <b>3</b> in chloroform- <i>d</i> (600 MHz) .....                   | <b>15</b> |
| <b>Figure S14.</b> HMBC NMR spectrum of compound <b>3</b> in chloroform- <i>d</i> (600 MHz) .....                   | <b>16</b> |
| <b>Figure S15.</b> HR-EIMS positive spectrum of compound <b>4</b> .....                                             | <b>17</b> |
| <b>Figure S16.</b> $^1\text{H}$ NMR spectrum of compound <b>4</b> in chloroform- <i>d</i> (600 MHz) .....           | <b>18</b> |
| <b>Figure S17.</b> $^{13}\text{C}$ NMR spectrum of compound <b>4</b> in chloroform- <i>d</i> (150 MHz).....         | <b>19</b> |
| <b>Figure S18.</b> HSQC NMR spectrum of compound <b>4</b> in chloroform- <i>d</i> (600 MHz) .....                   | <b>20</b> |
| <b>Figure S19.</b> COSY NMR spectrum of compound <b>4</b> in chloroform- <i>d</i> (600 MHz) .....                   | <b>21</b> |
| <b>Figure S20.</b> HMBC NMR spectrum of compound <b>4</b> in chloroform- <i>d</i> (600 MHz) .....                   | <b>22</b> |
| <b>Figure S21.</b> $^1\text{H}$ NMR spectrum of compound <b>5</b> in chloroform- <i>d</i> (600 MHz).....            | <b>23</b> |
| <b>Figure S22.</b> $^1\text{H}$ NMR spectrum of compound <b>6</b> in chloroform- <i>d</i> (600 MHz).....            | <b>24</b> |
| <b>Figure S23.</b> $^1\text{H}$ NMR spectrum of compound <b>7</b> in DMSO- <i>d</i> <sub>6</sub> (600 MHz).....     | <b>25</b> |
| <b>Figure S24.</b> $^1\text{H}$ NMR spectrum of compound <b>8</b> in methanol- <i>d</i> <sub>4</sub> (600 MHz)..... | <b>26</b> |
| <b>Figure S25.</b> $^1\text{H}$ NMR spectrum of compound <b>9</b> in chloroform- <i>d</i> (600 MHz).....            | <b>27</b> |
| <b>Figure S26.</b> $^1\text{H}$ NMR spectrum of compound <b>10</b> in chloroform- <i>d</i> (600 MHz).....           | <b>28</b> |
| <b>Table S1.</b> Cytotoxicity of compounds <b>3</b> against HCT116 cells.....                                       | <b>29</b> |
| <b>Table S2.</b> NO inhibition of compounds <b>3</b> against LPS-induced RAW264.7 cells.....                        | <b>29</b> |



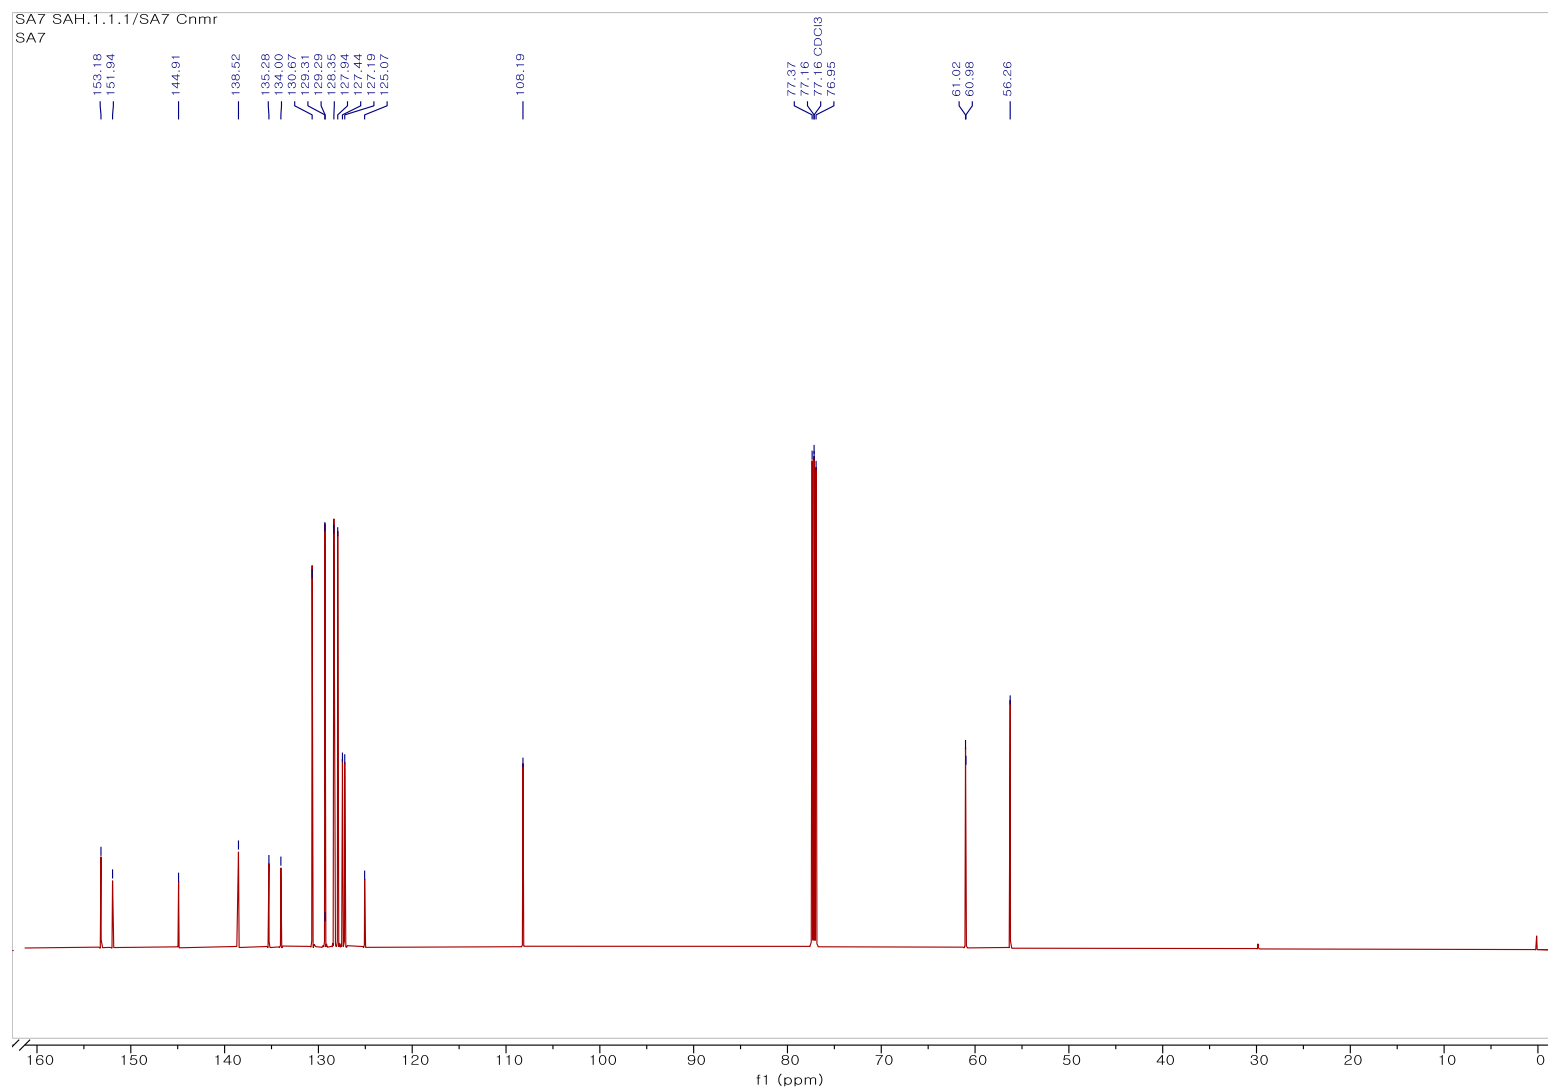

**Figure S2.**  $^{13}\text{C}$  NMR spectrum of compound **1** in chloroform-*d* (150 MHz).

[ Mass Spectrum ]

Data : EI-B026 Date : 06-Sep-2021 13:42

RT : 1.32 min Scan# : (73,103)

Elements : C 100/0, H 100/0, O 10/0

Mass Tolerance : 10ppm, 5mmu if  $m/z < 500$ , 10mmu if  $m/z > 1000$

Unsaturation (U.S.) : -0.5 - 20.0

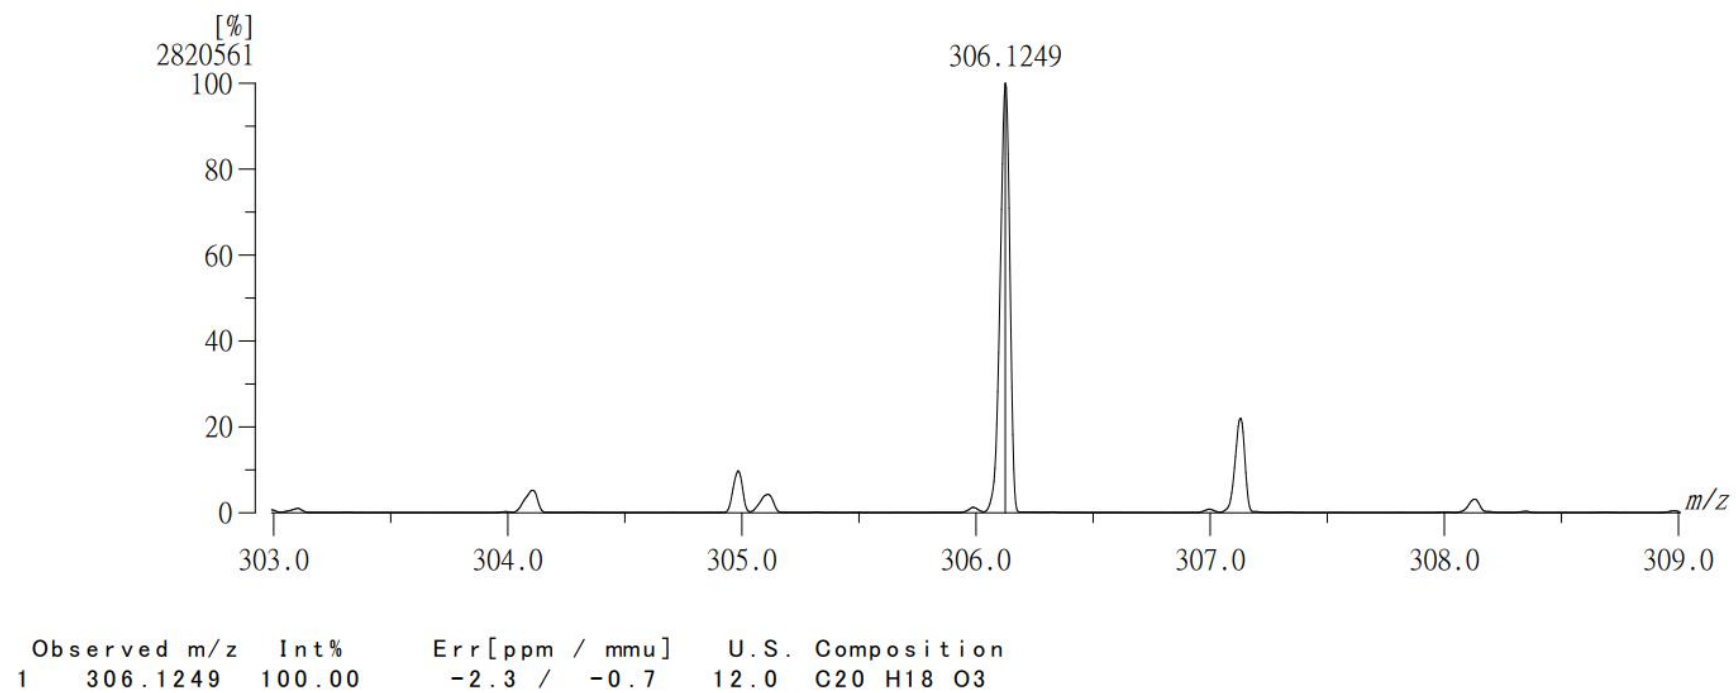

**Figure S3.** HR-EIMS positive spectrum of compound **2**.



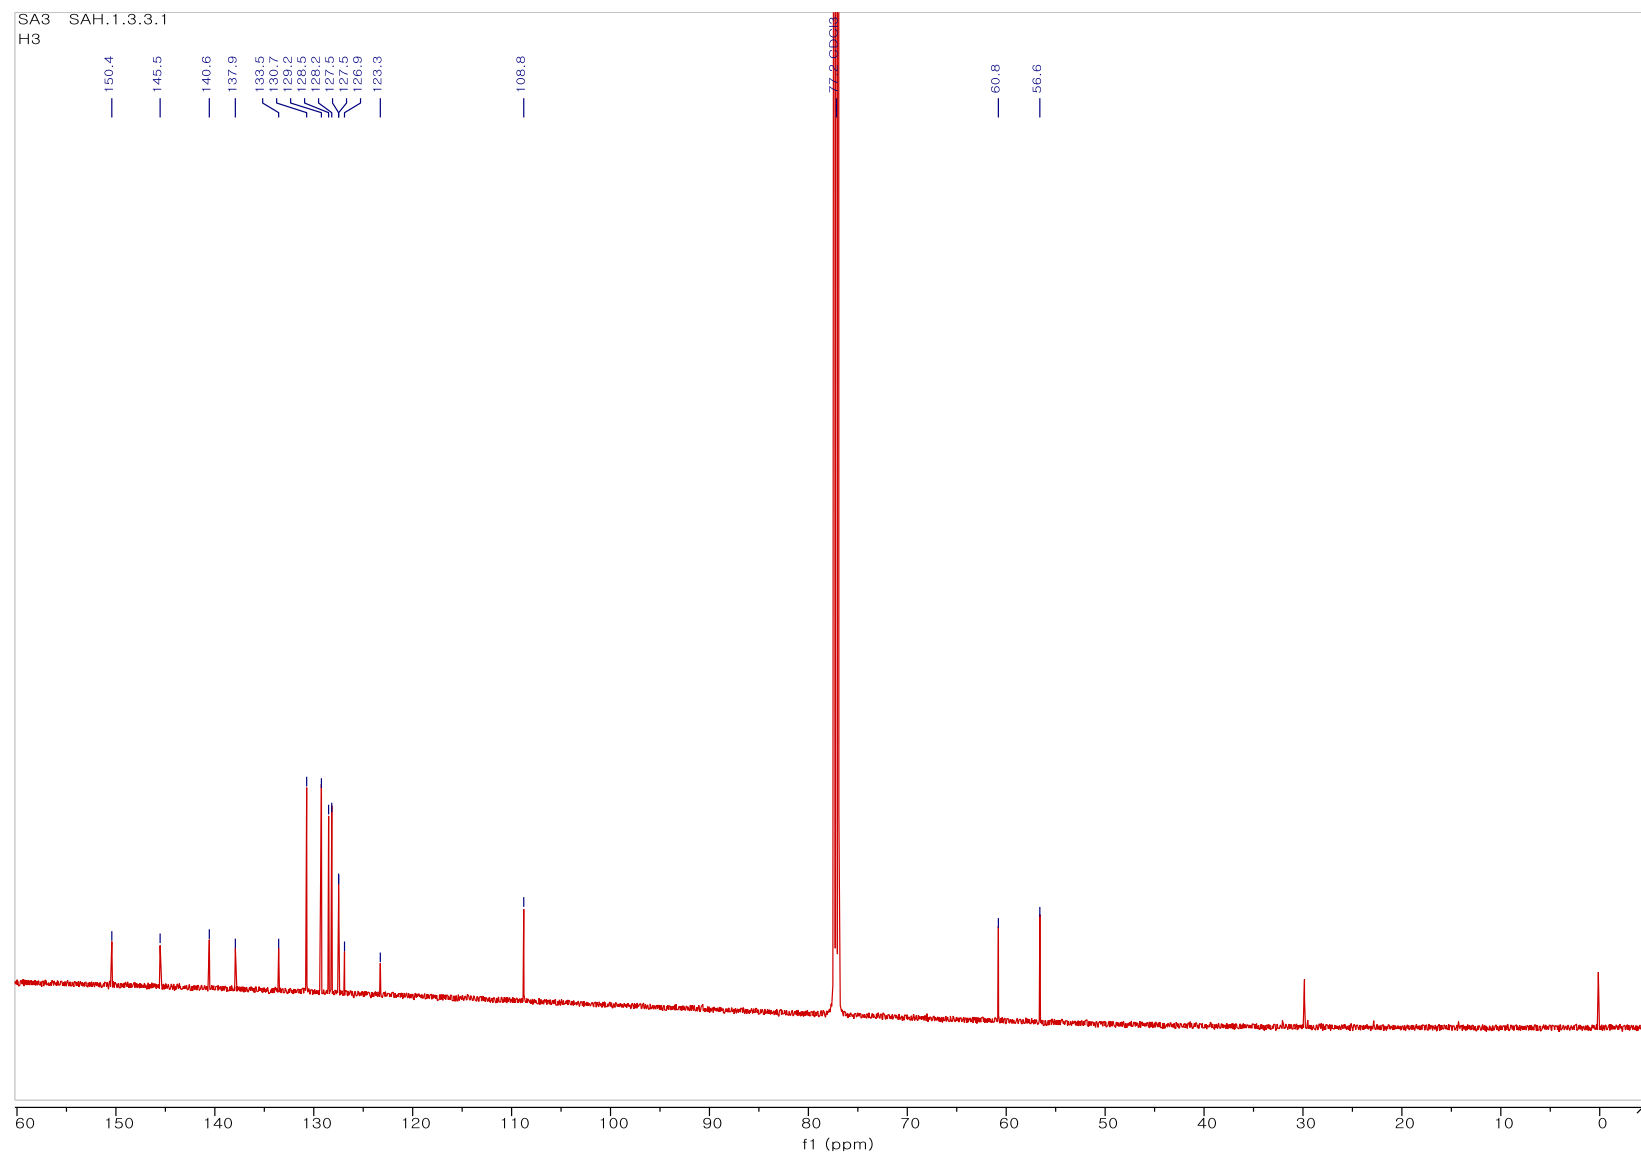

**Figure S5.**  $^{13}\text{C}$  NMR spectrum of compound **2** in chloroform-*d* (150 MHz).

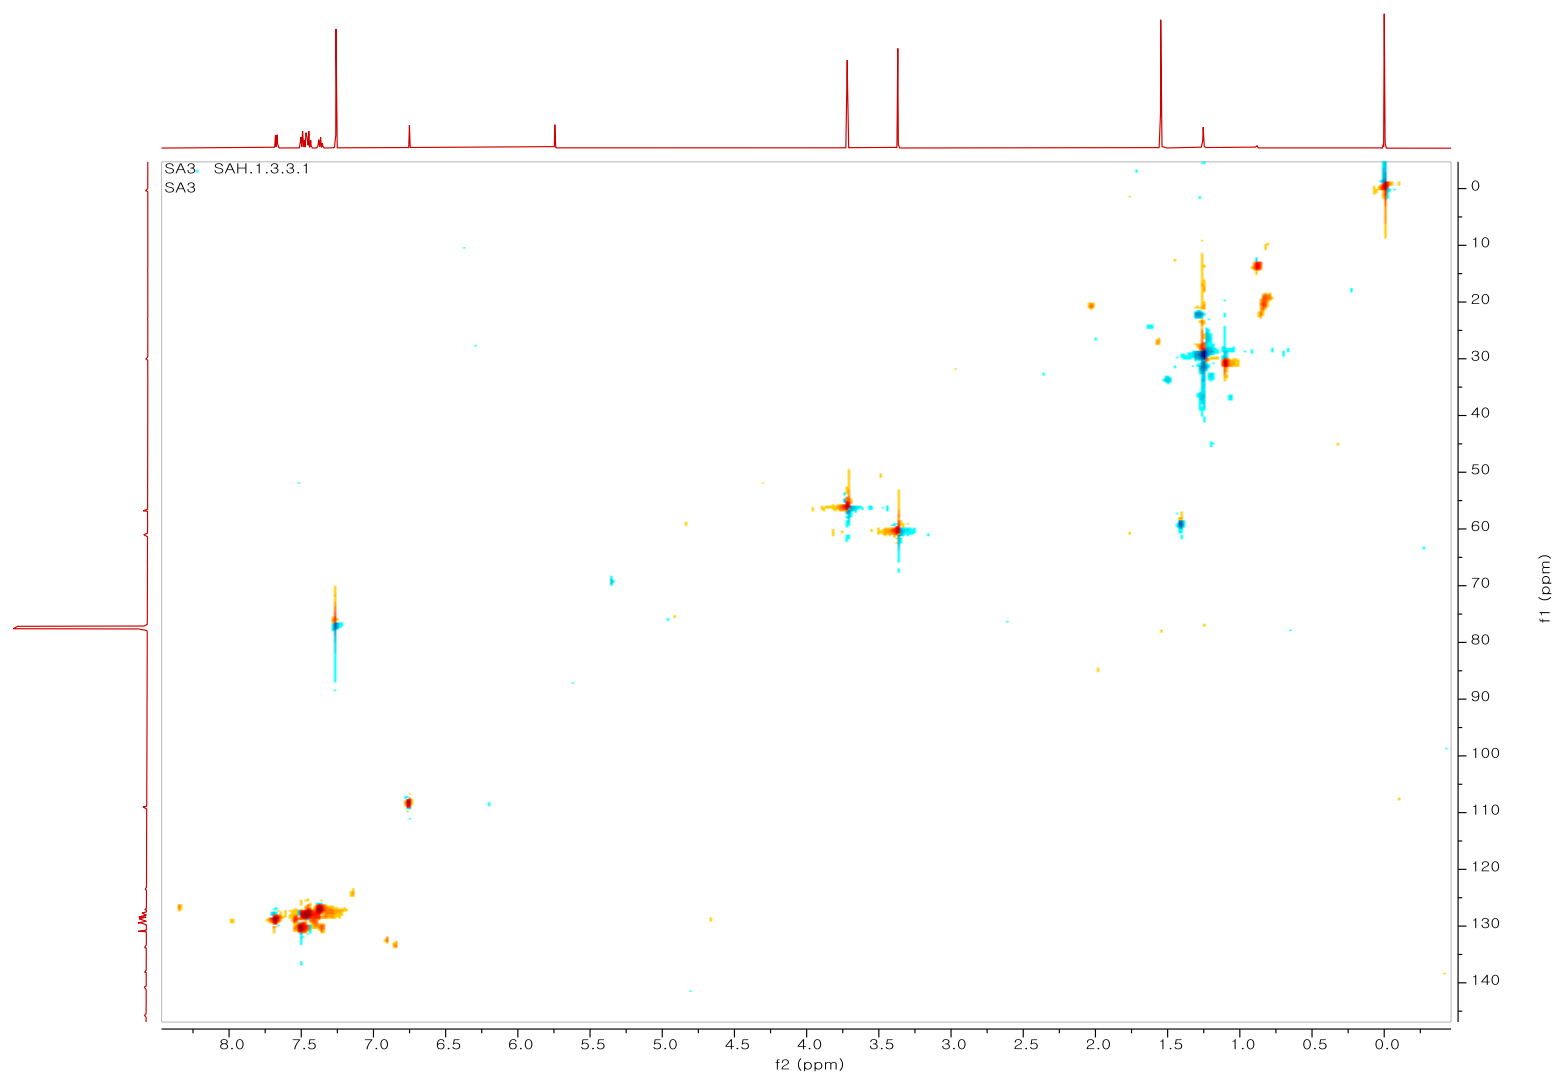

**Figure S6.** HSQC NMR spectrum of compound **2** in chloroform-*d* (600 MHz).



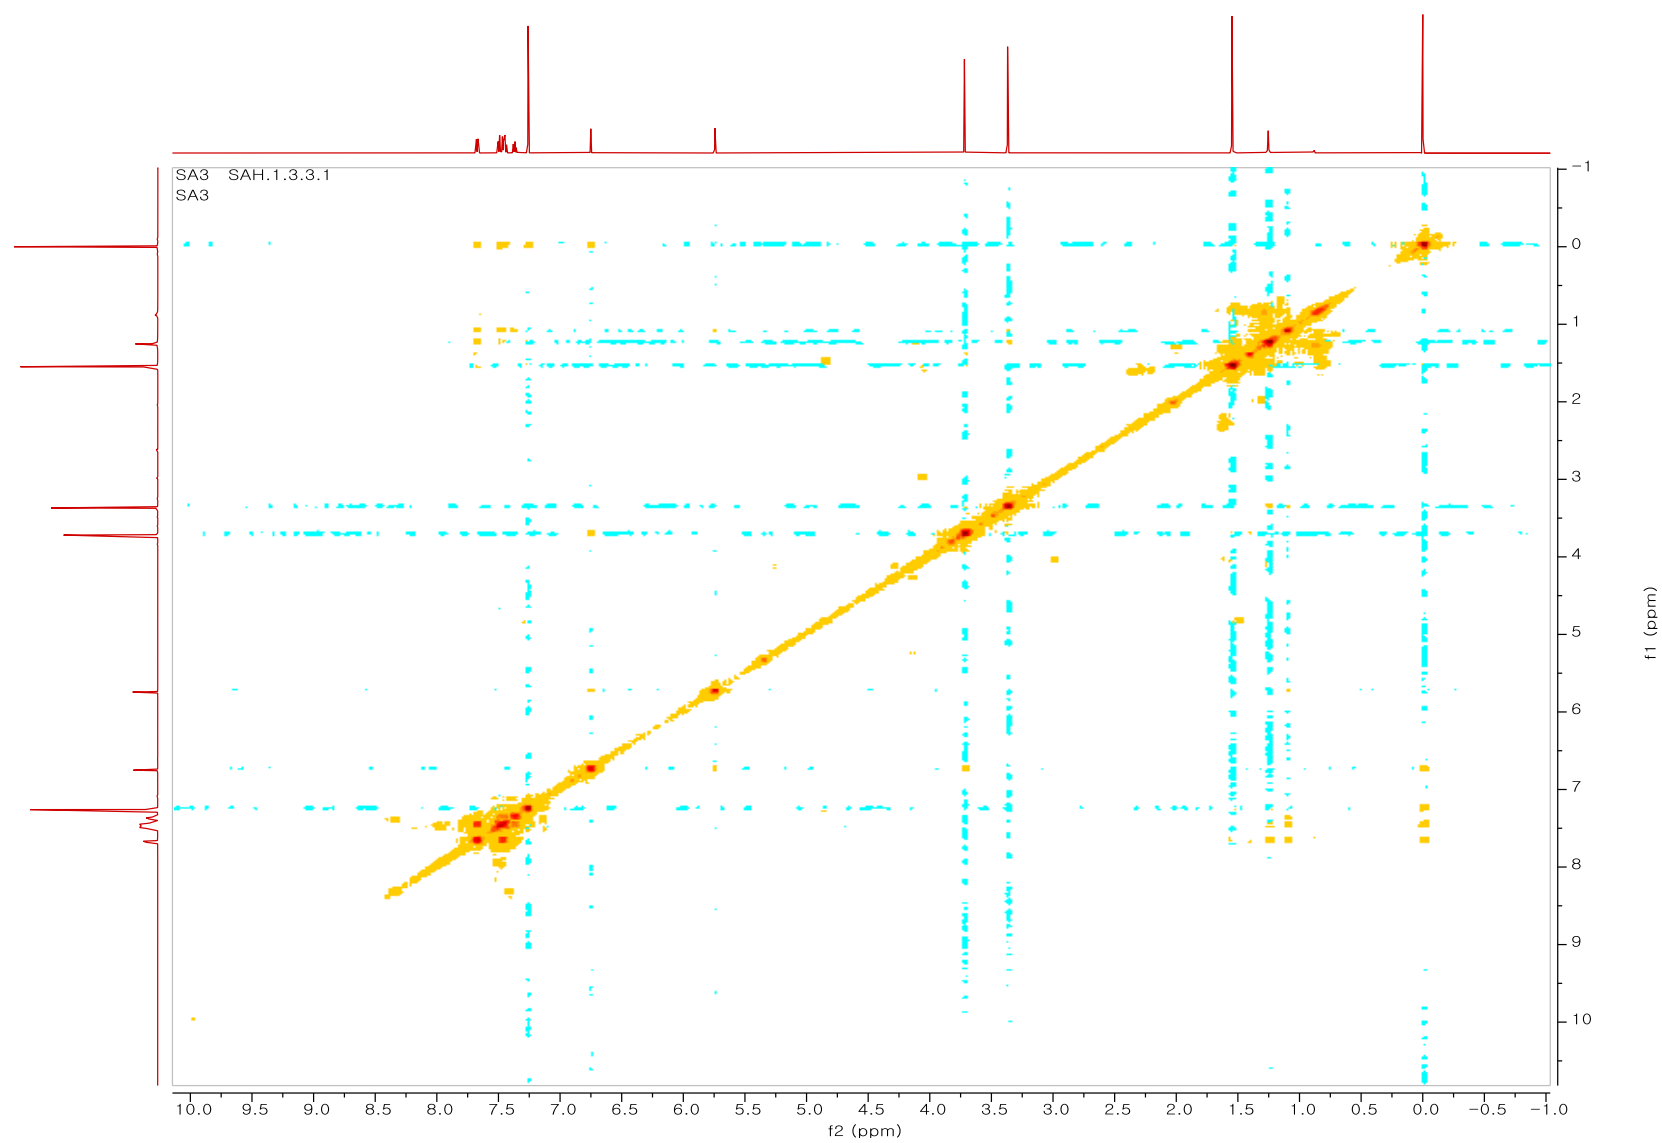

**Figure S7.** COSY NMR spectrum of compound **2** in chloroform-*d* (600 MHz).

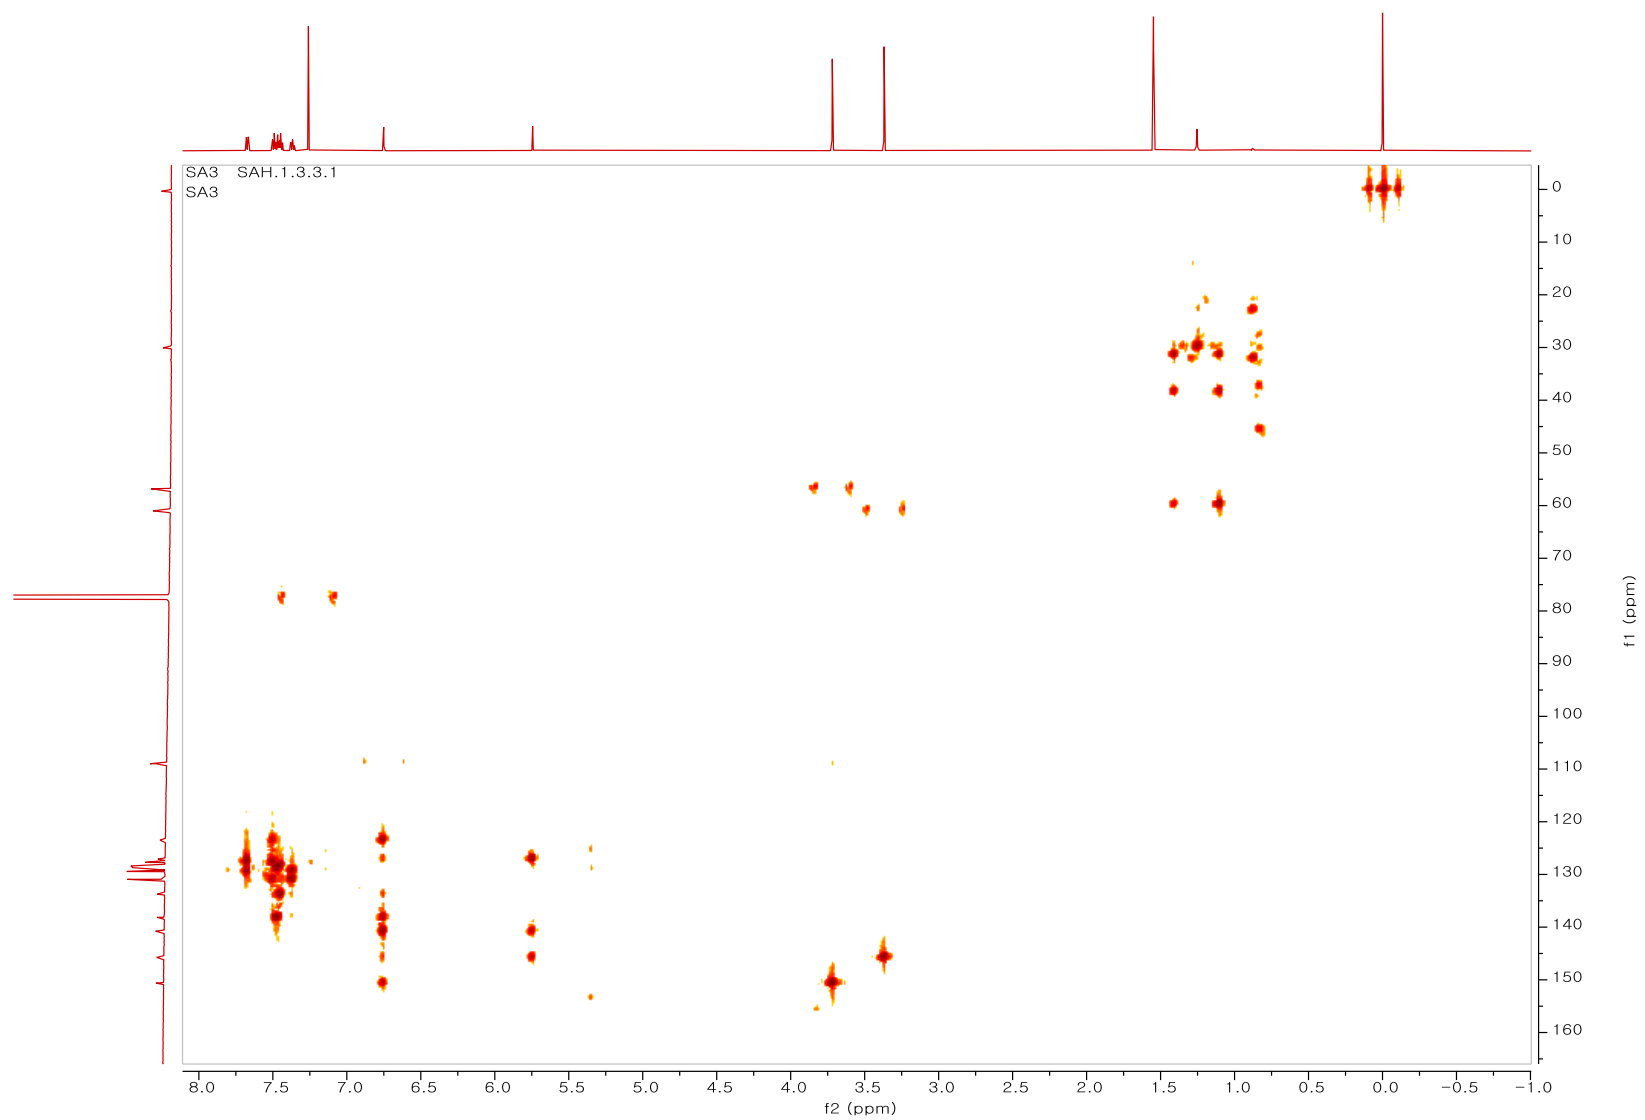

**Figure S8.** HMBC NMR spectrum of compound **2** in chloroform-*d* (600 MHz).

[ Mass Spectrum ]

Data : EI-B027 Date : 06-Sep-2021 13:55

RT : 0.88 min Scan# : (49,59)

Elements : C 100/0, H 100/0, O 10/0

Mass Tolerance : 10ppm, 5mmu if  $m/z < 500$ , 10mmu if  $m/z > 1000$

Unsaturation (U.S.) : -0.5 - 20.0

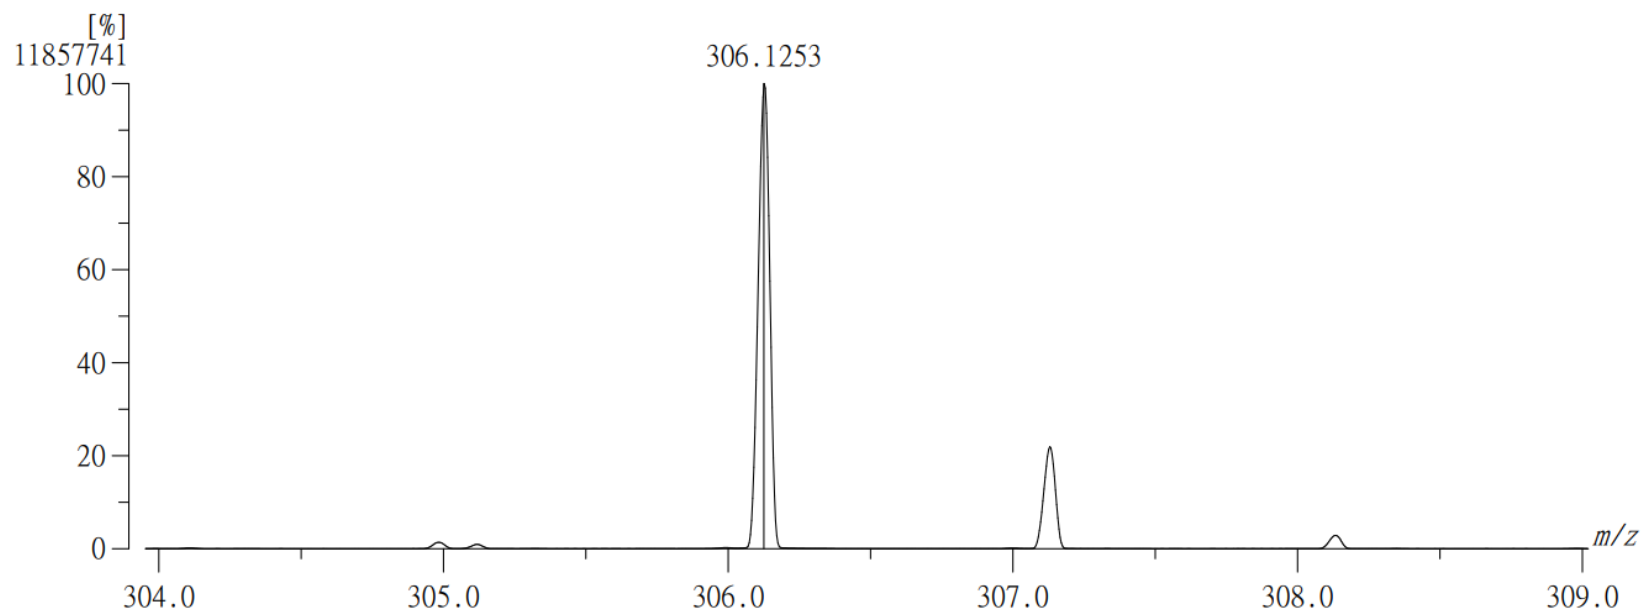

|   | Observed $m/z$ | Int%   | Err [ppm / mmu] | U.S. | Composition |
|---|----------------|--------|-----------------|------|-------------|
| 1 | 306.1253       | 100.00 | -1.0 / -0.3     | 12.0 | C20 H18 O3  |

**Figure S9.** HR-EIMS positive spectrum of compound **3**.



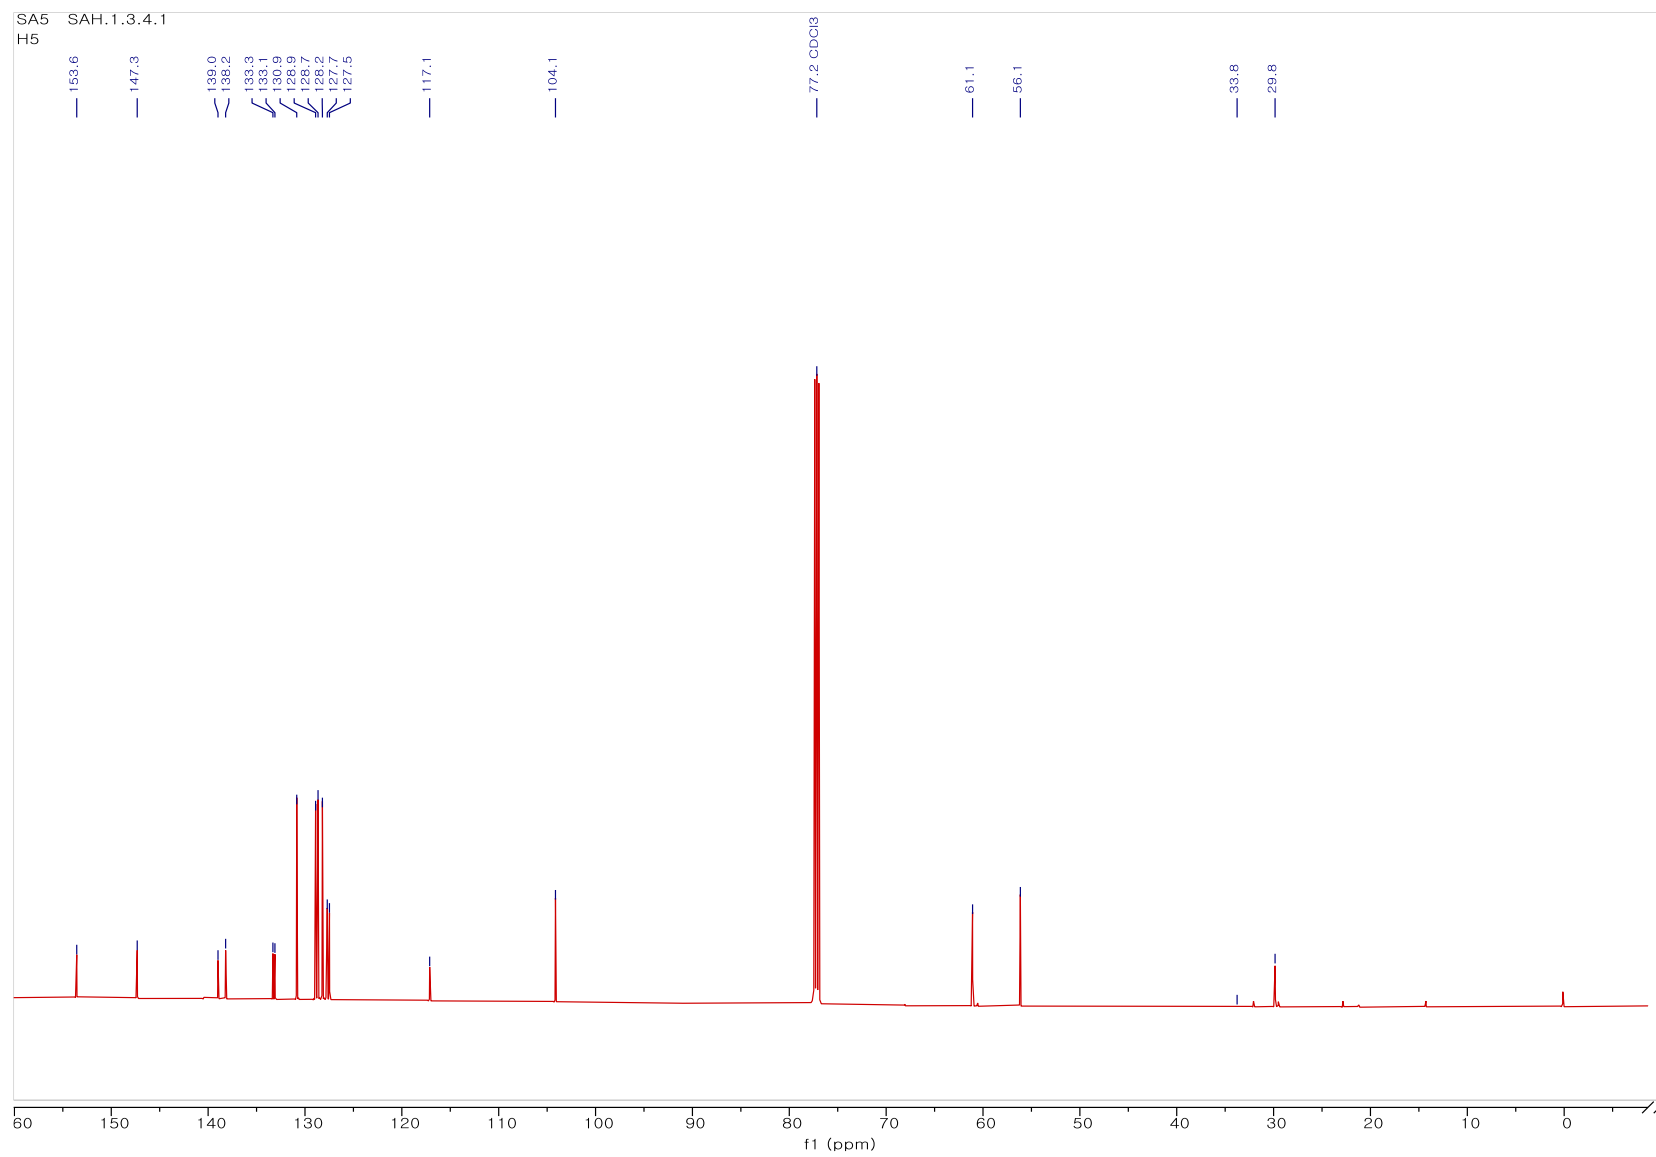

**Figure S11.**  $^{13}\text{C}$  NMR spectrum of compound **3** in chloroform-*d* (150 MHz).



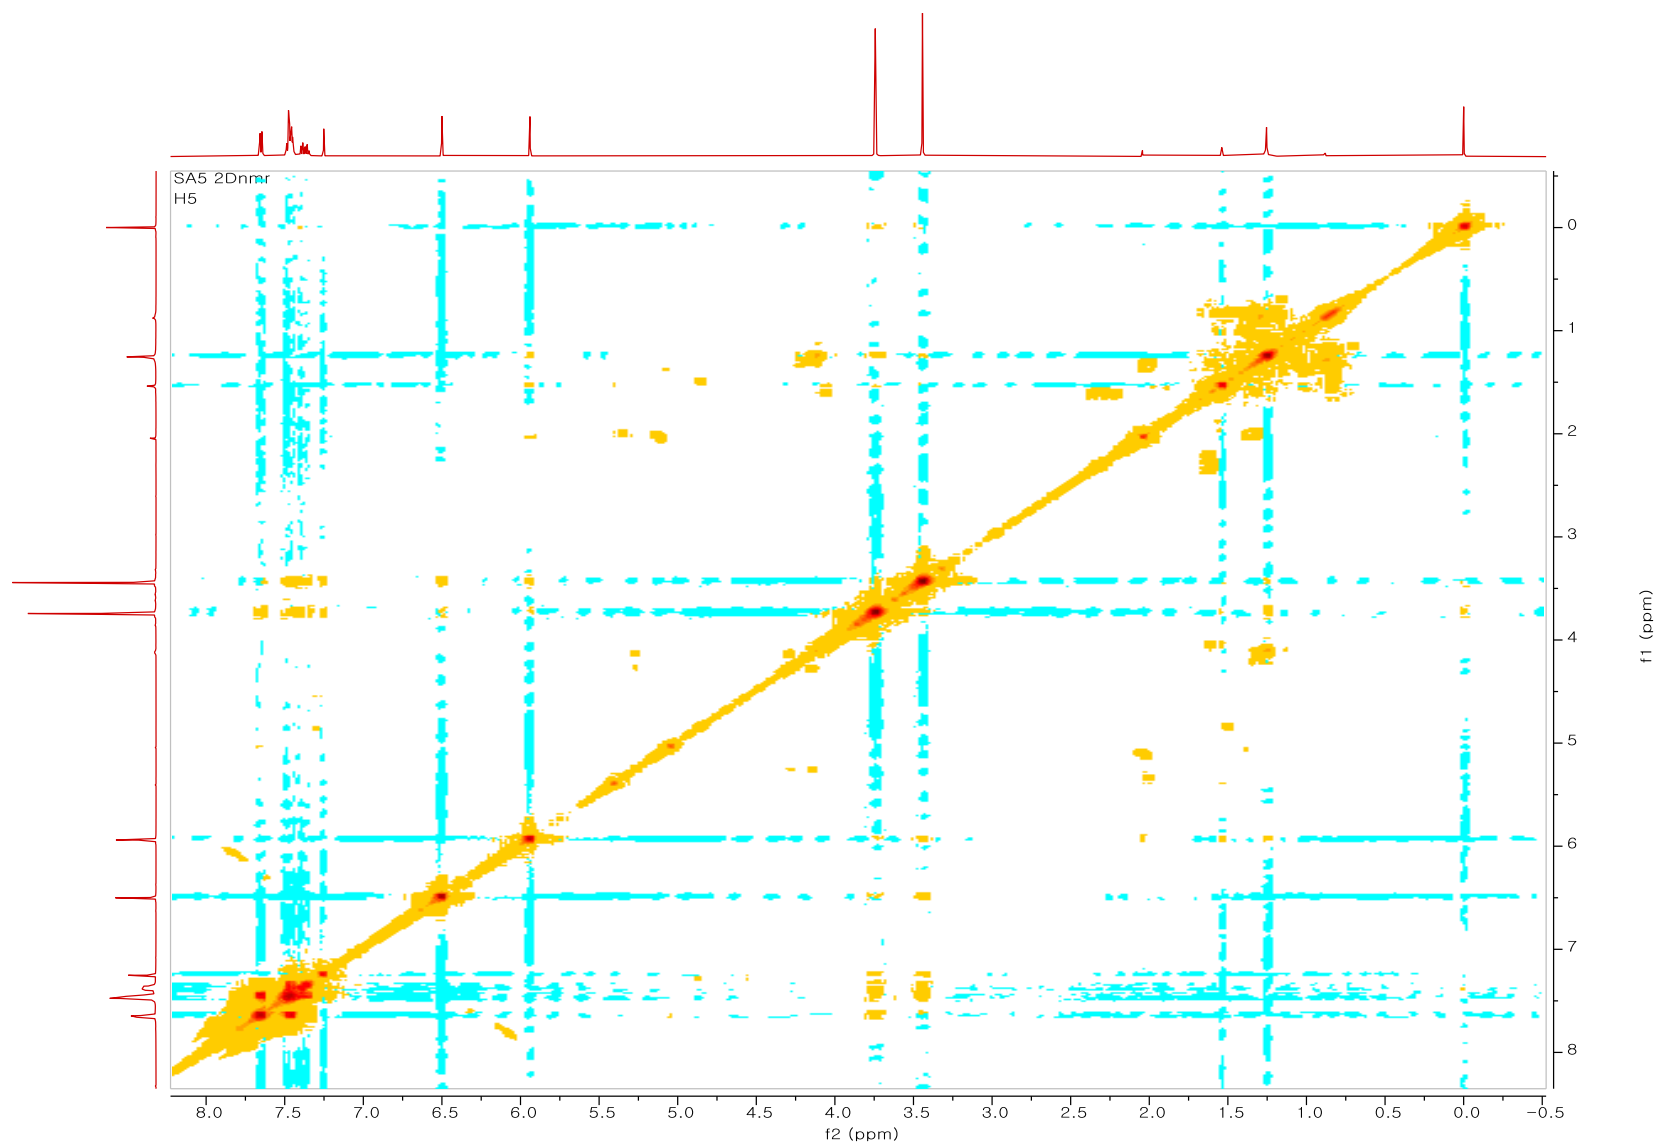

**Figure S13.** COSY NMR spectrum of compound **3** in chloroform-*d* (600 MHz).

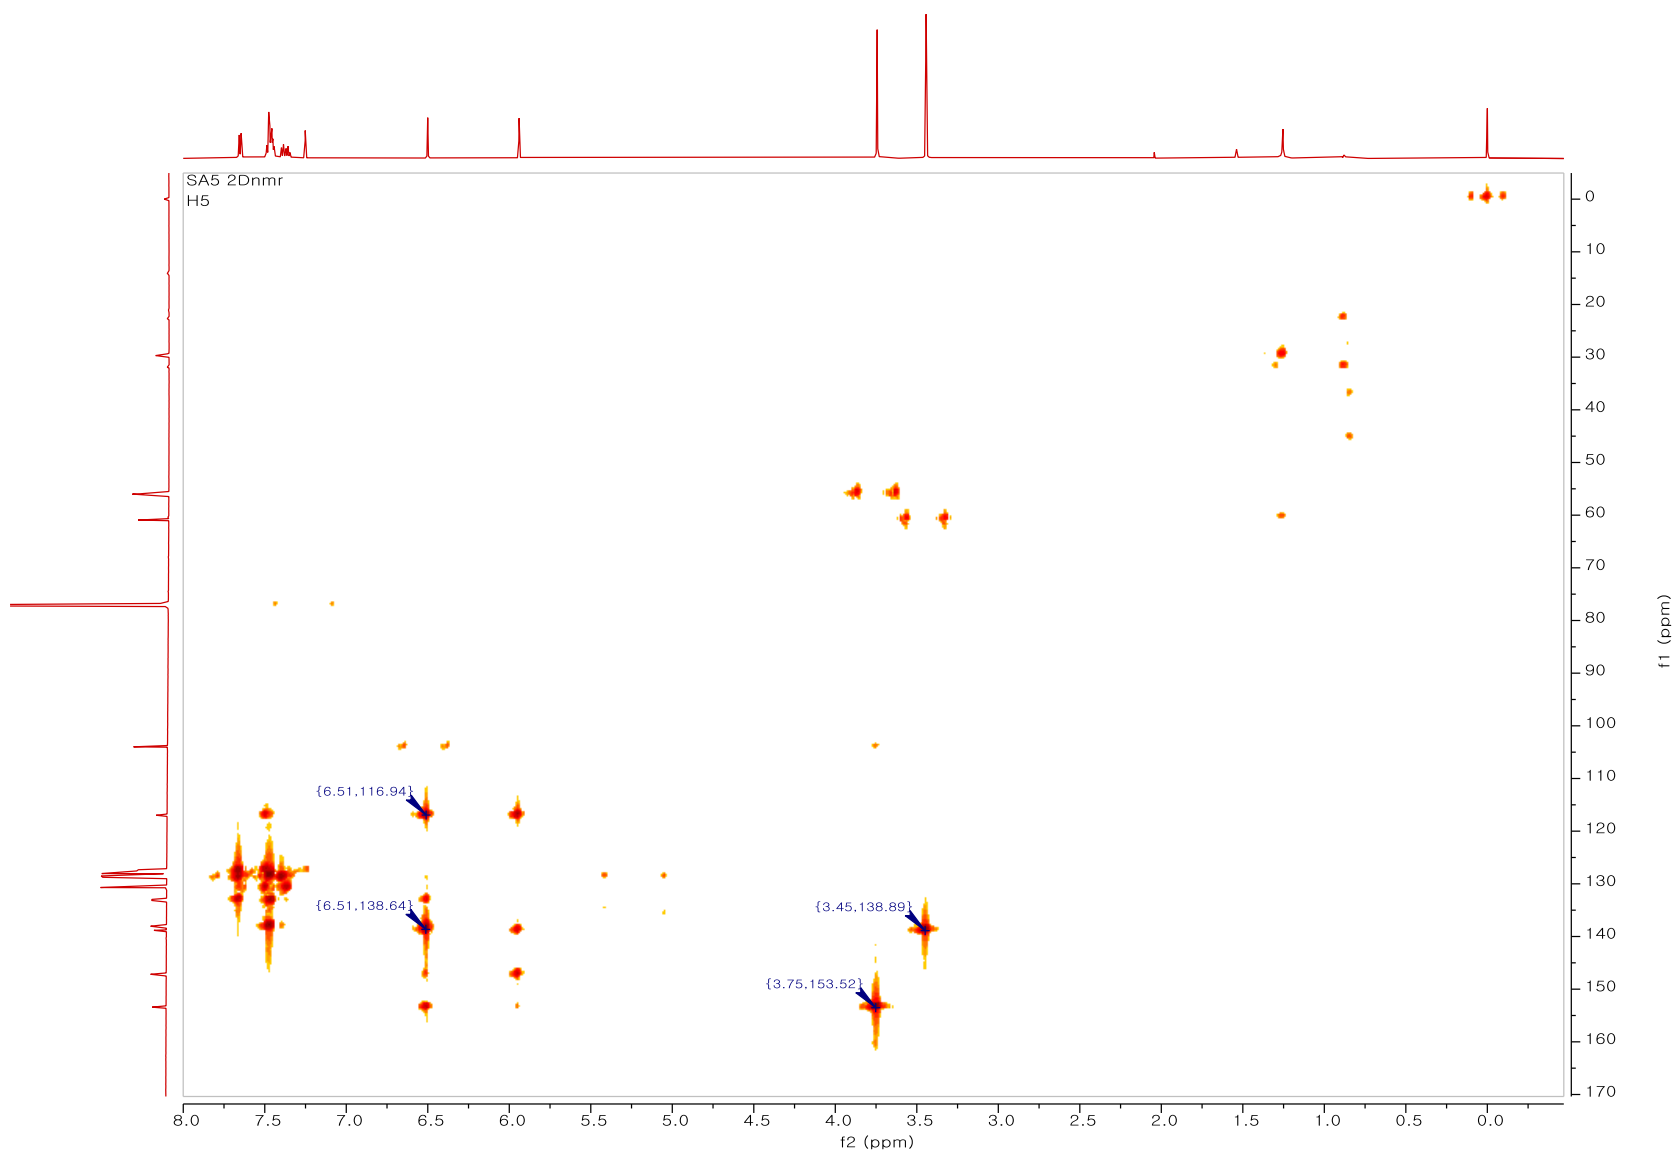

**Figure S14.** HMBC NMR spectrum of compound **3** in chloroform-*d* (600 MHz).



[ Mass Spectrum ]

Data : EI-B029 Date : 06-Sep-2021 14:08

RT : 0.74 min Scan# : (42,48)

Elements : C 100/0, H 100/0, O 10/0

Mass Tolerance : 10ppm, 5mmu if  $m/z < 500$ , 10mmu if  $m/z > 1000$

Unsaturation (U.S.) : -0.5 - 20.0

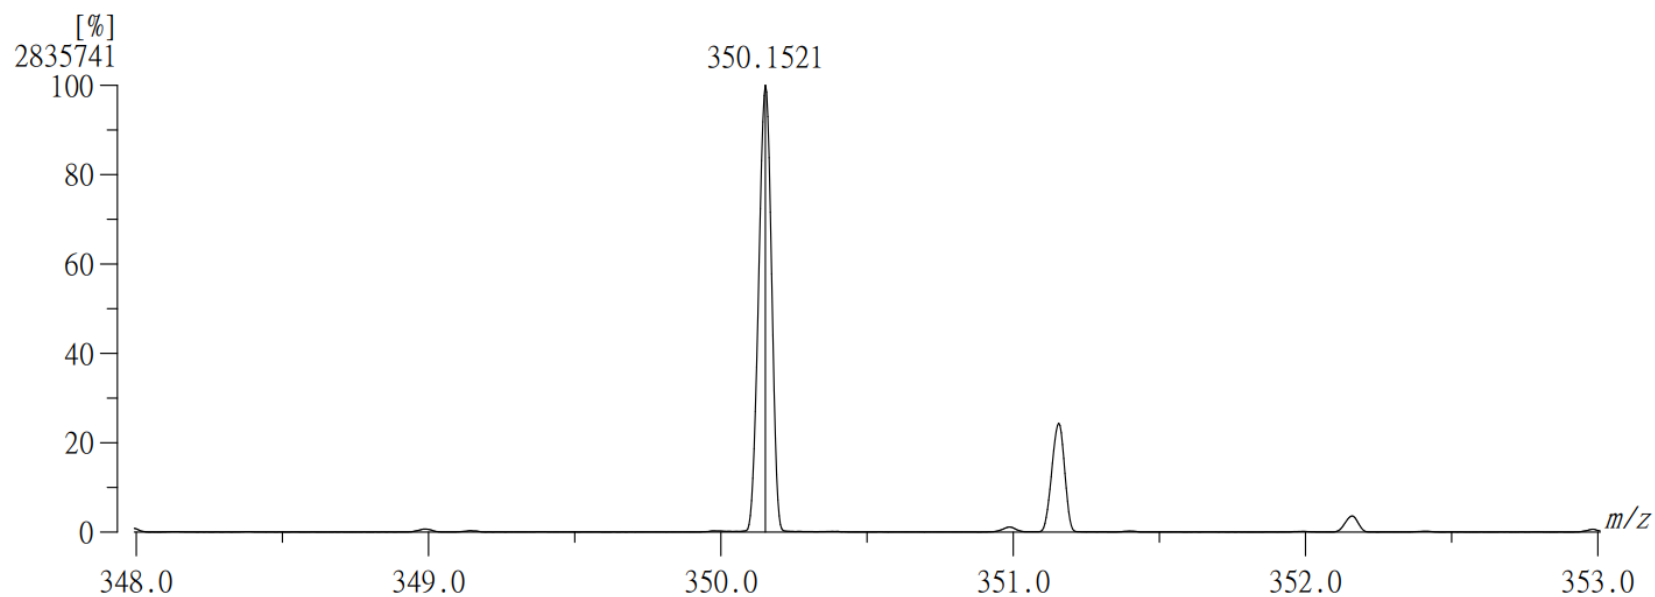

| Observed $m/z$ | Int%   | Err[ppm / mmu] | U.S. | Composition |
|----------------|--------|----------------|------|-------------|
| 1 350.1521     | 100.00 | +0.8 / +0.3    | 12.0 | C22 H22 O4  |

**Figure S15.** HR-EIMS positive spectrum of compound **4**.

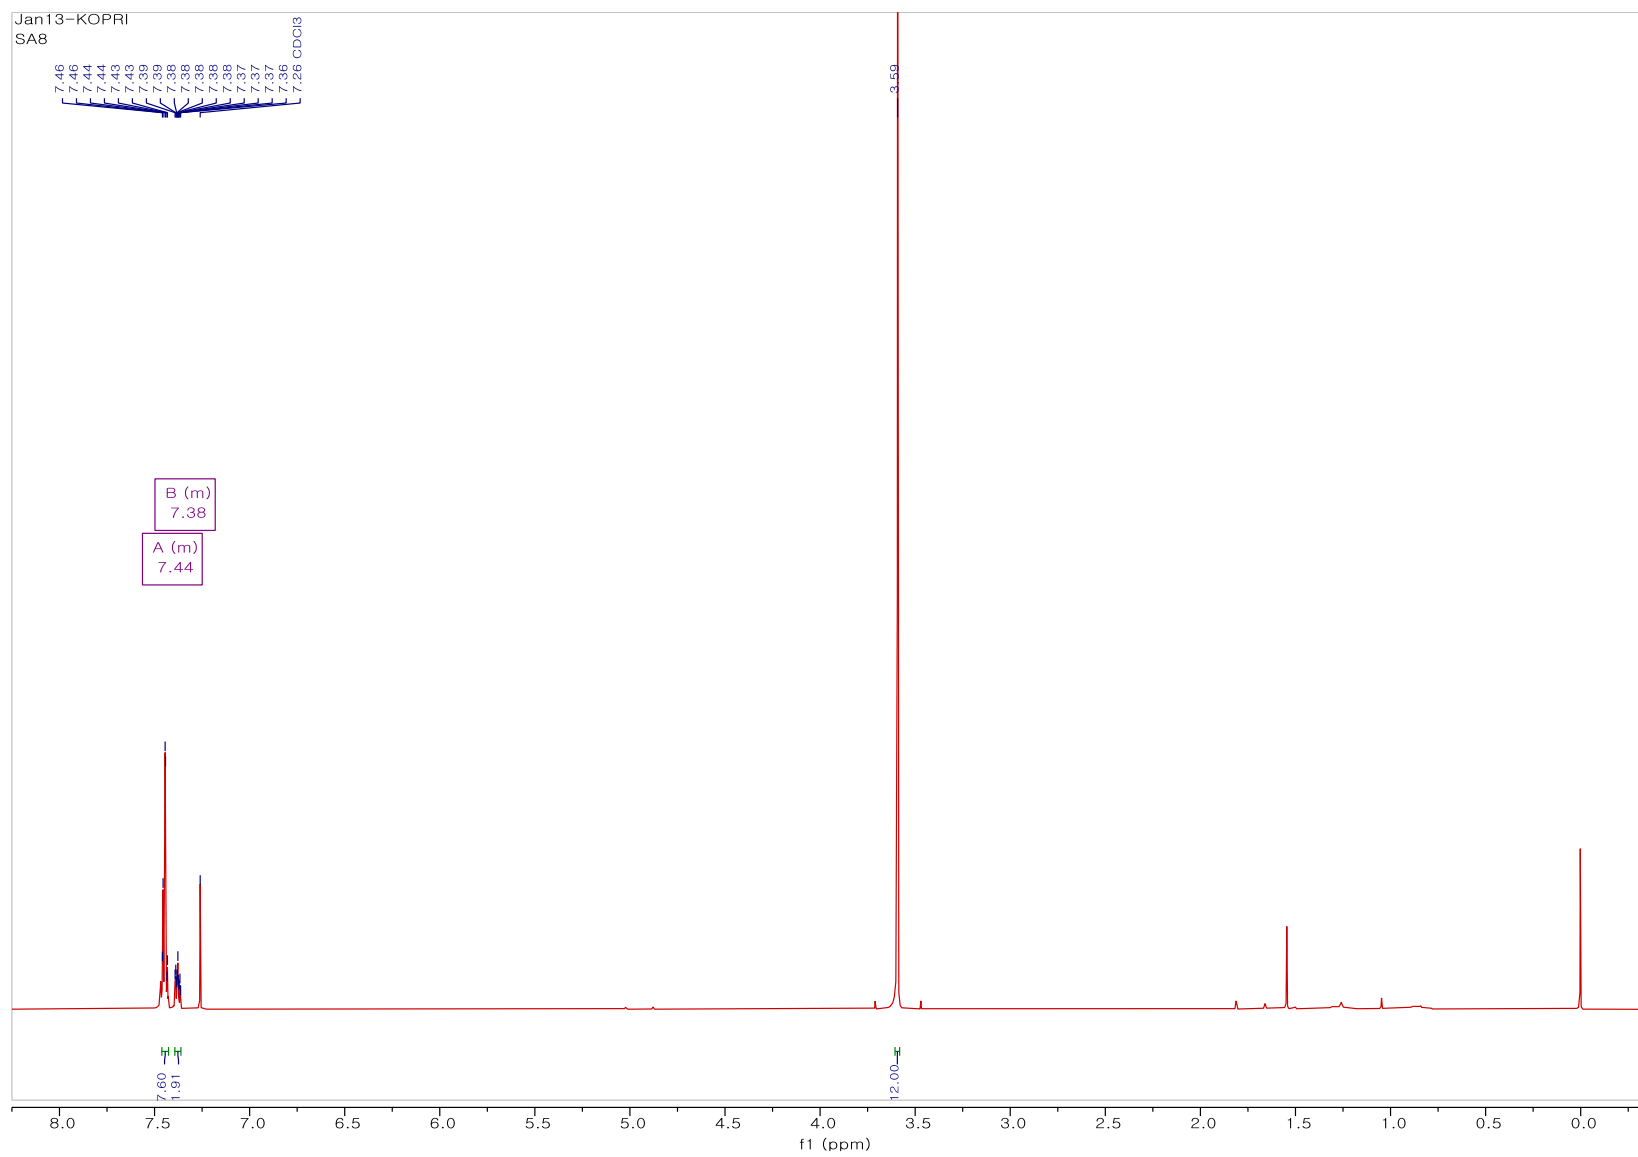

**Figure S16.**  $^1\text{H}$  NMR spectrum of compound **4** in chloroform-*d* (600 MHz).

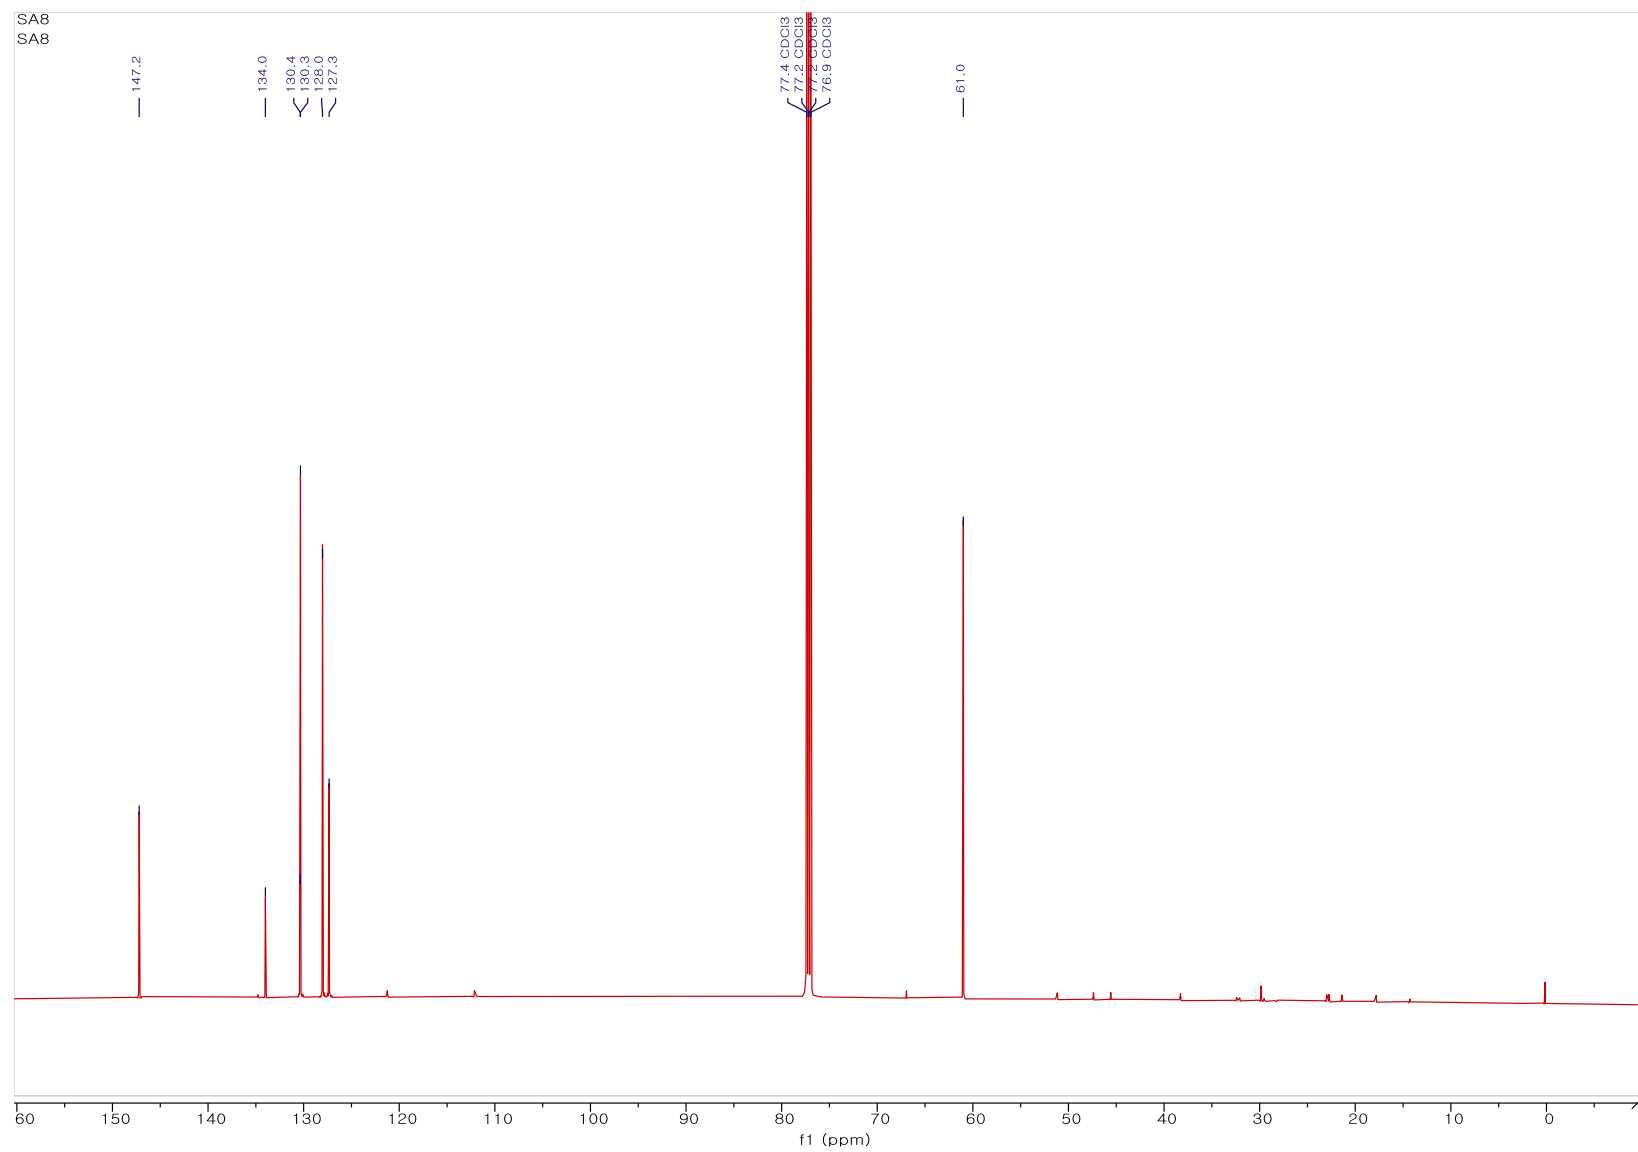

**Figure S17.** <sup>13</sup>C NMR spectrum of compound **4** in chloroform-*d* (150 MHz).

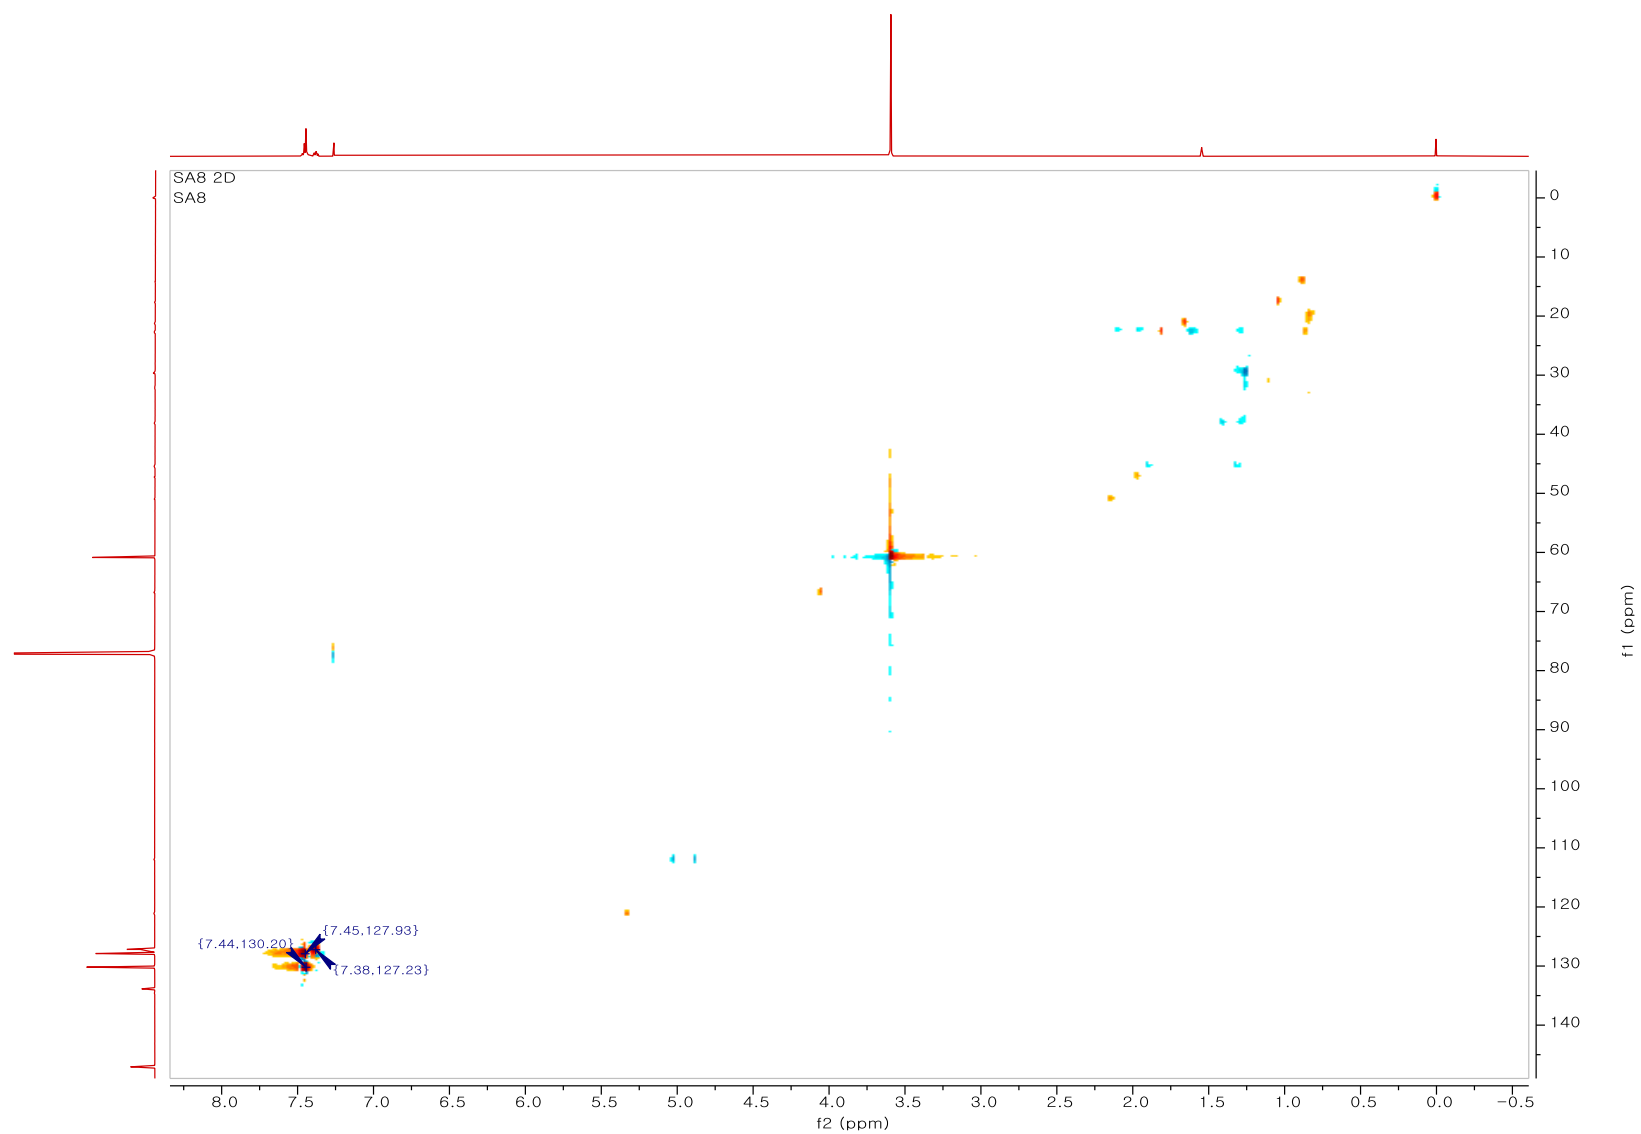

**Figure S18.** HSQC NMR spectrum of compound **4** in chloroform-*d* (600 MHz).

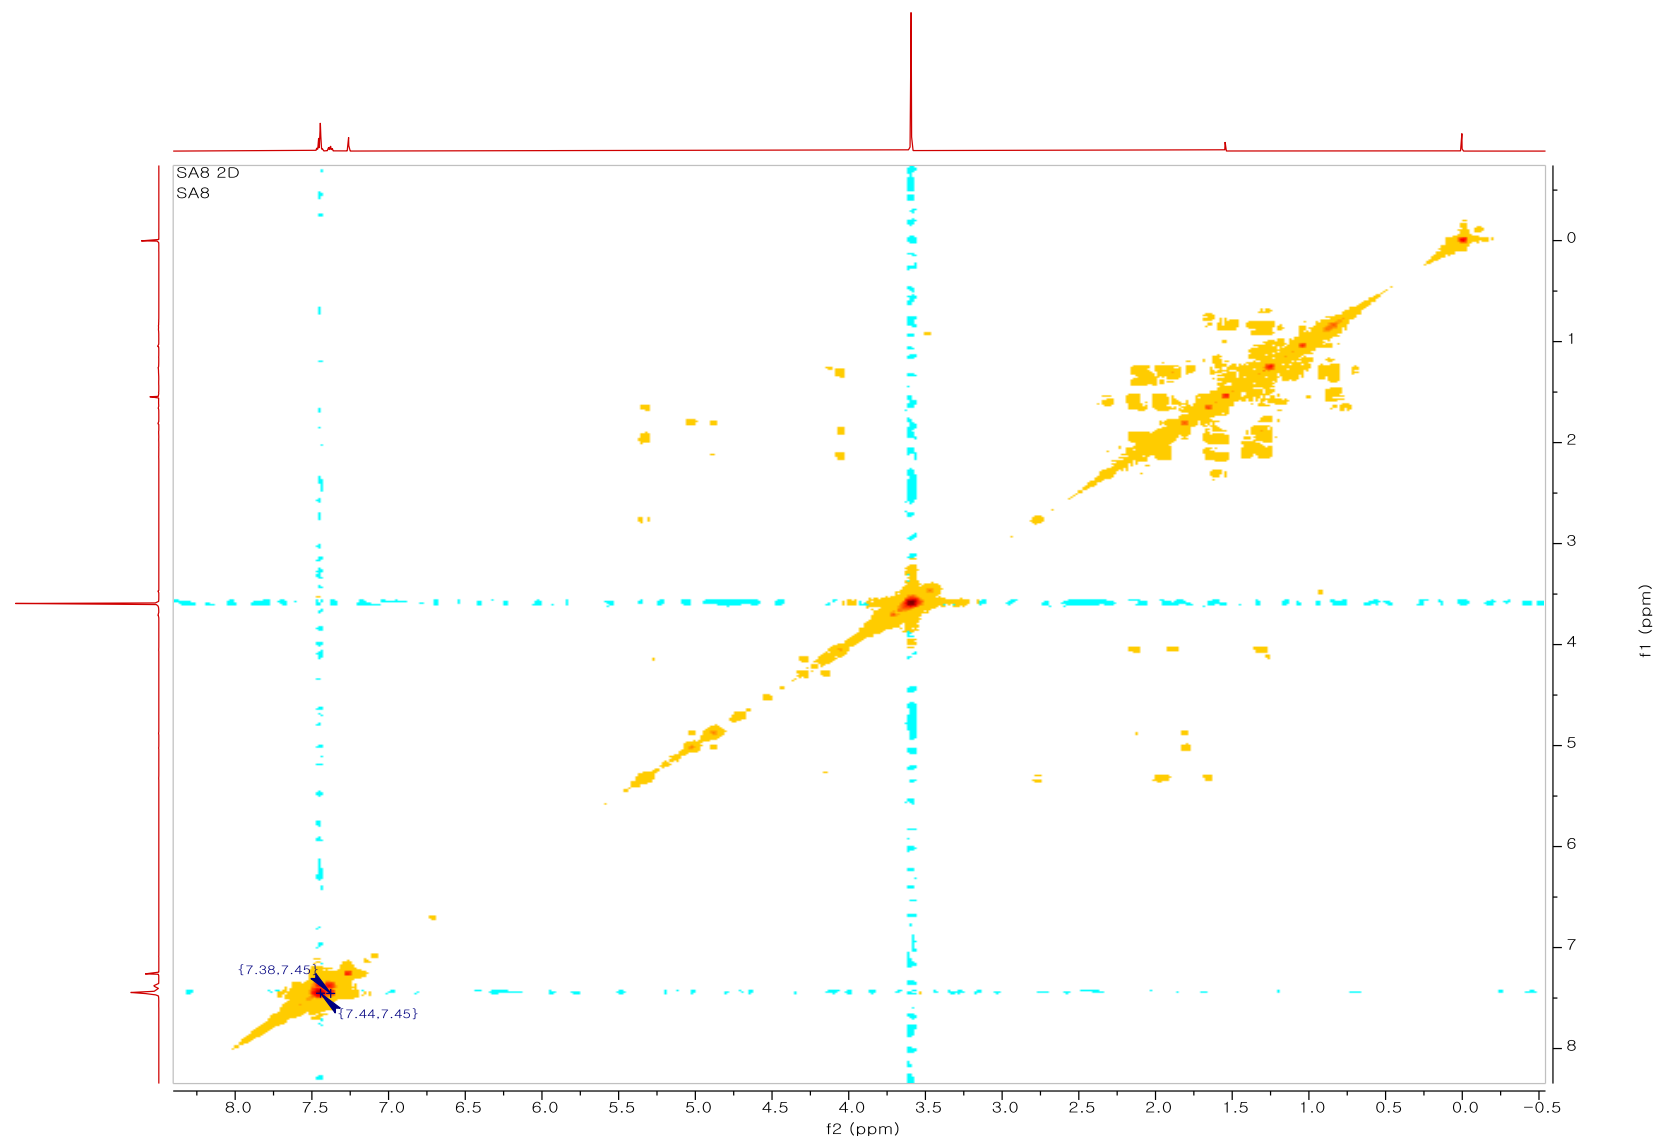

**Figure S19.** COSY NMR spectrum of compound **4** in chloroform-*d* (600 MHz).

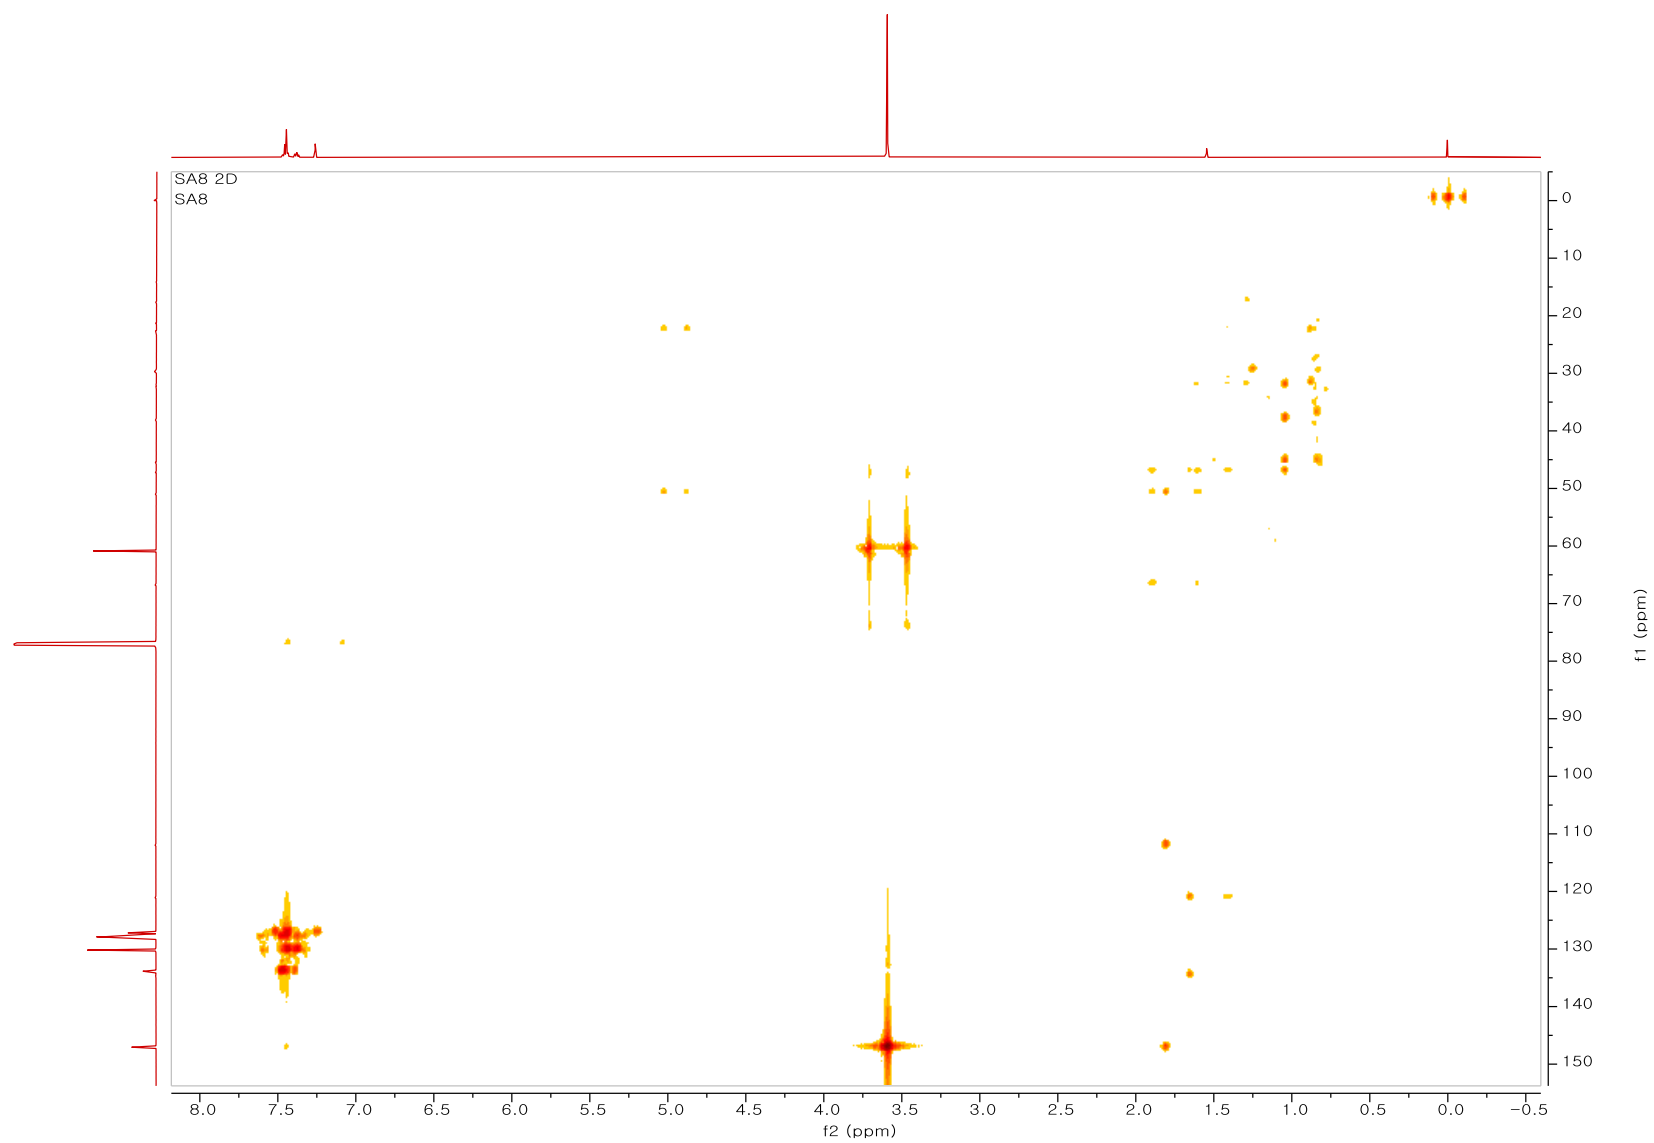

**Figure S20.** HMBC NMR spectrum of compound **4** in chloroform-*d* (600 MHz).

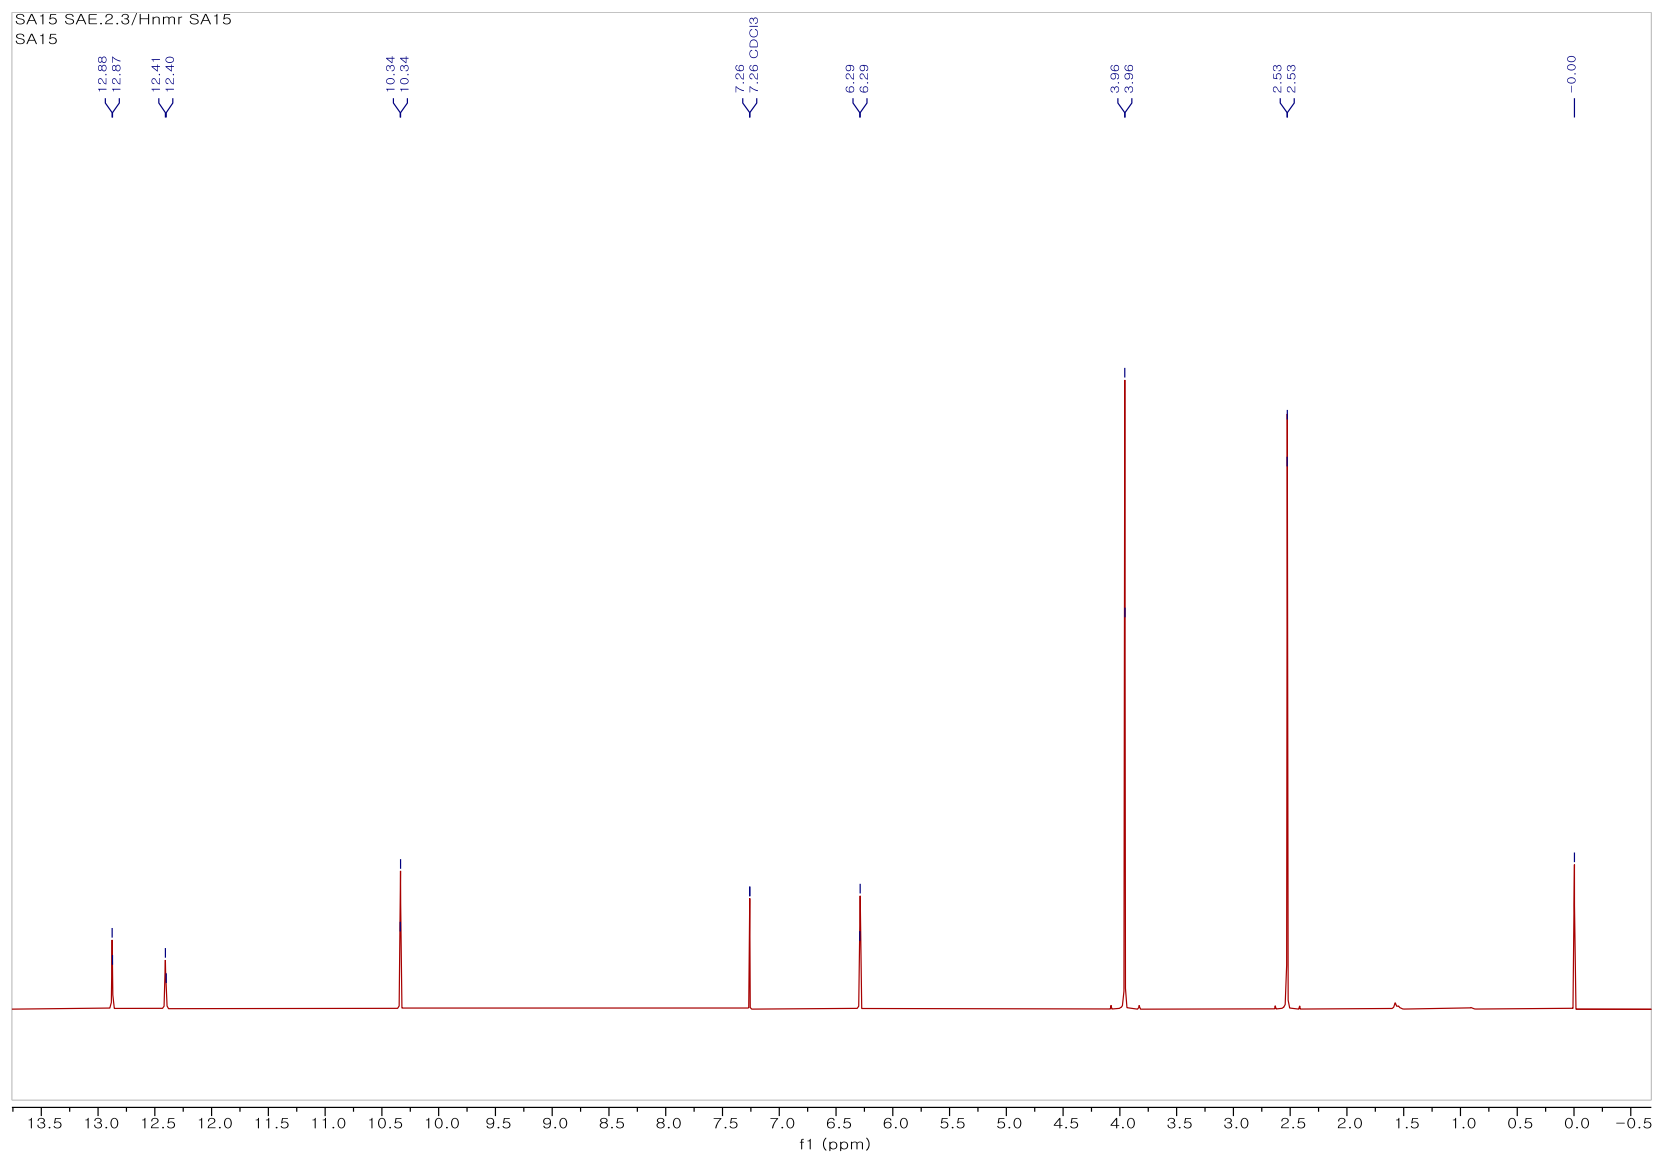

**Figure S21.**  $^1\text{H}$  NMR spectrum of compound **5** in chloroform-*d* (600 MHz).

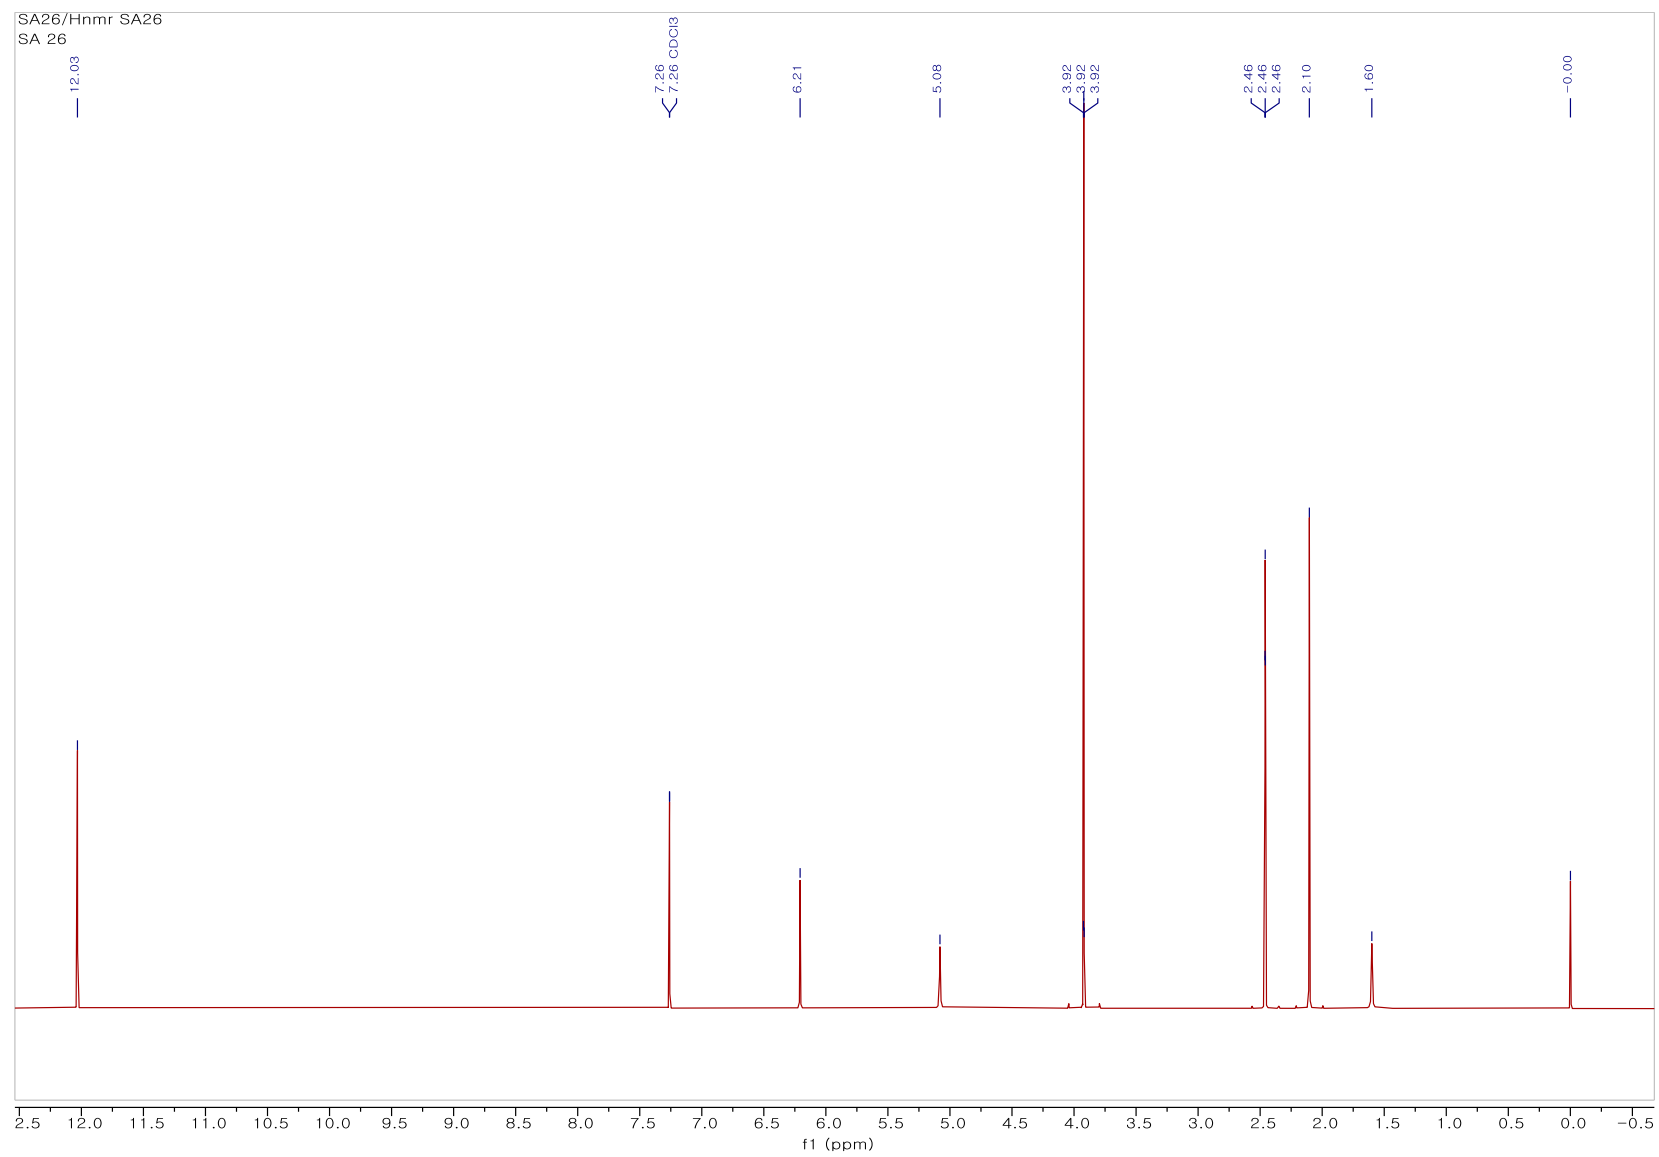

**Figure S22.**  $^1\text{H}$  NMR spectrum of compound **6** in chloroform-*d* (600 MHz).



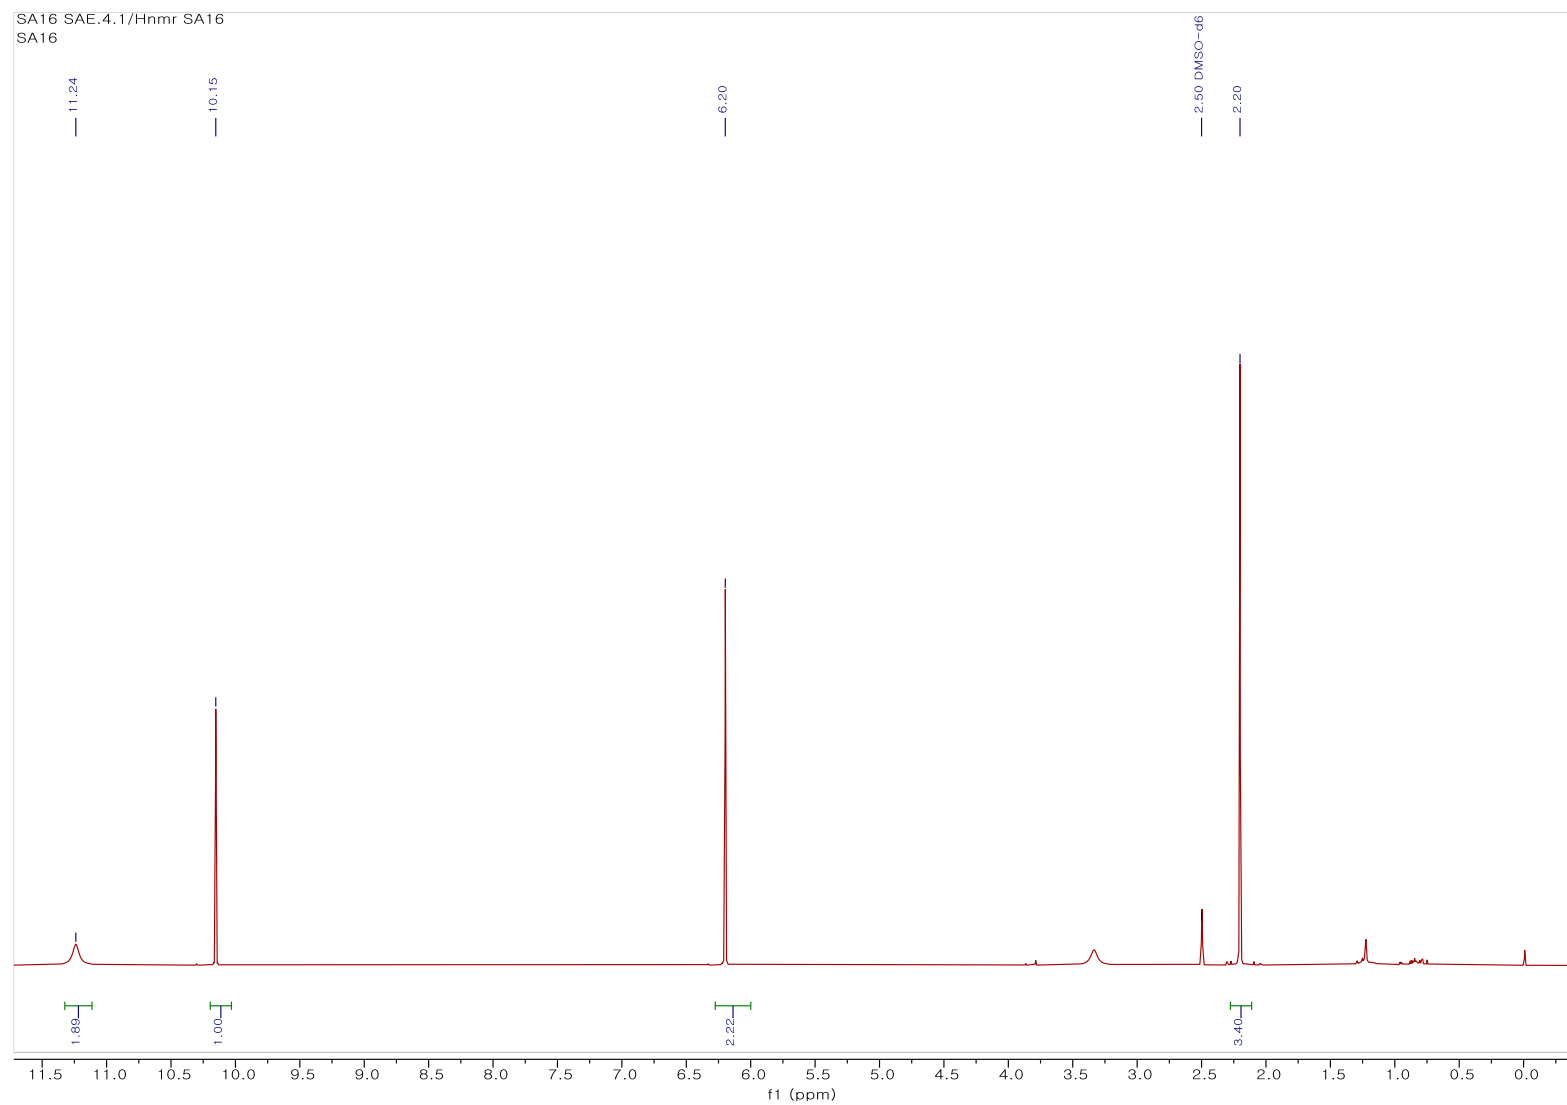

**Figure S23.**  $^1\text{H}$  NMR spectrum of compound **7** in  $\text{DMSO-}d_6$  (600 MHz).

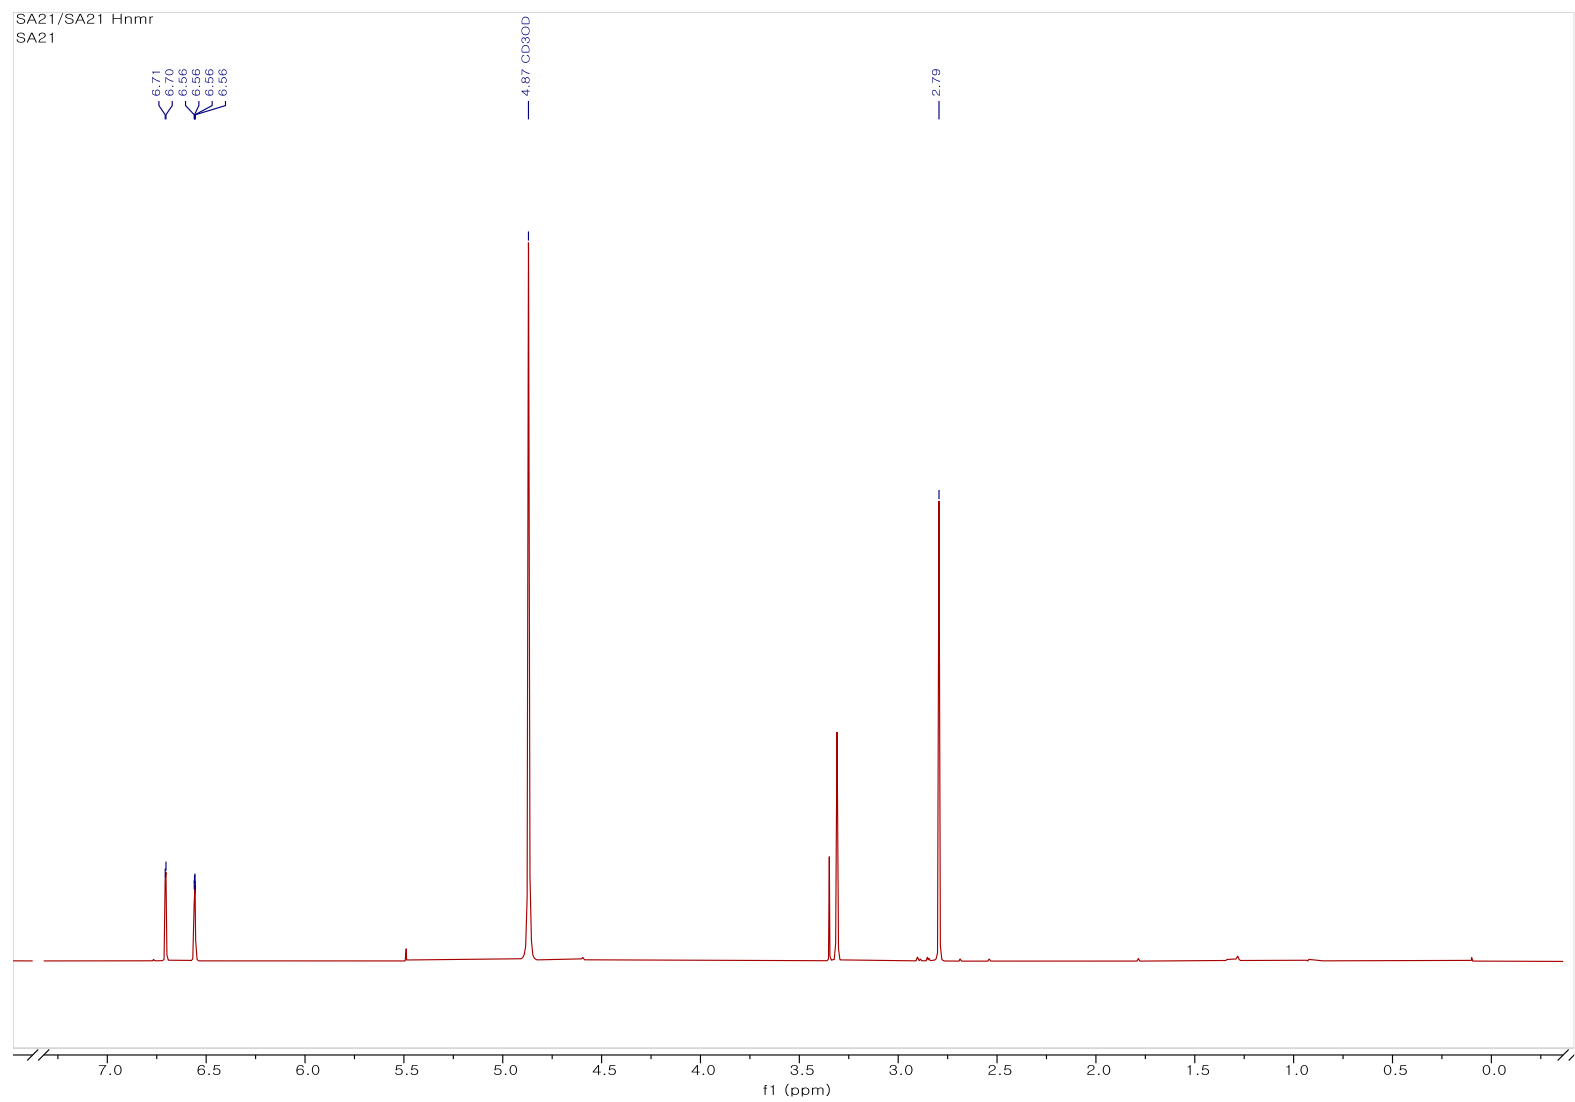

**Figure S24.** <sup>1</sup>H NMR spectrum of compound **8** in methanol-*d*<sub>4</sub> (600 MHz).

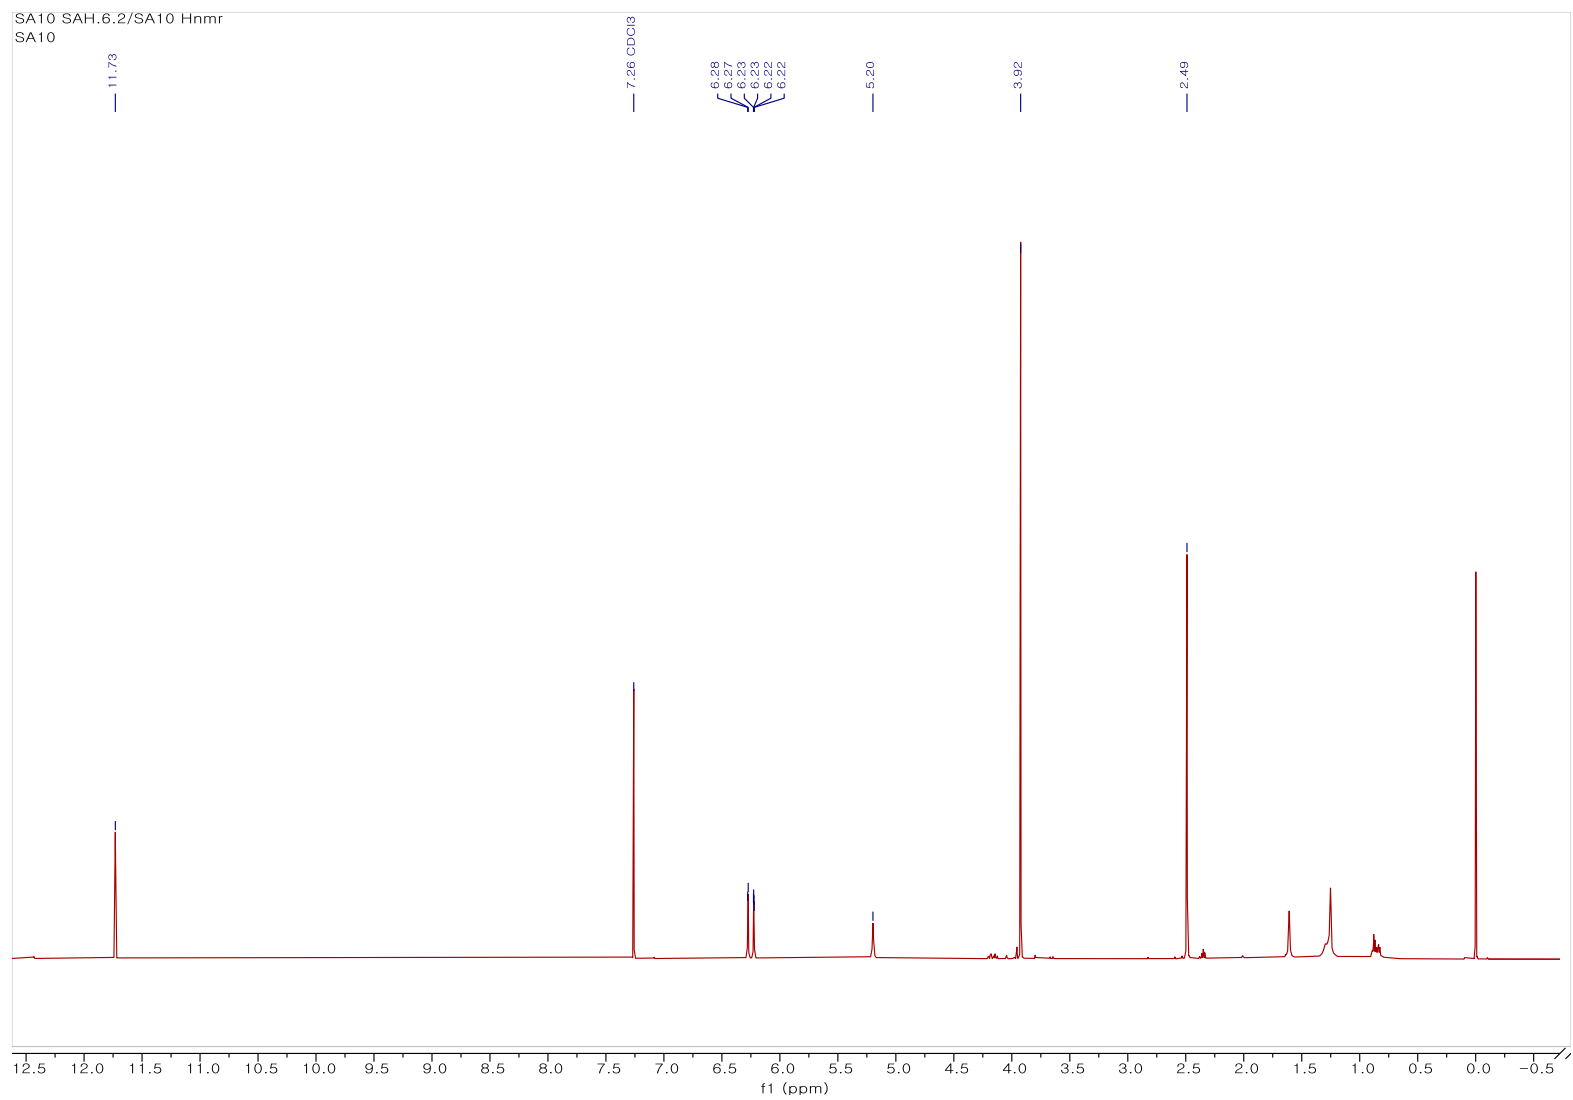

**Figure S25.**  $^1\text{H}$  NMR spectrum of compound **9** in chloroform-*d* (600 MHz).

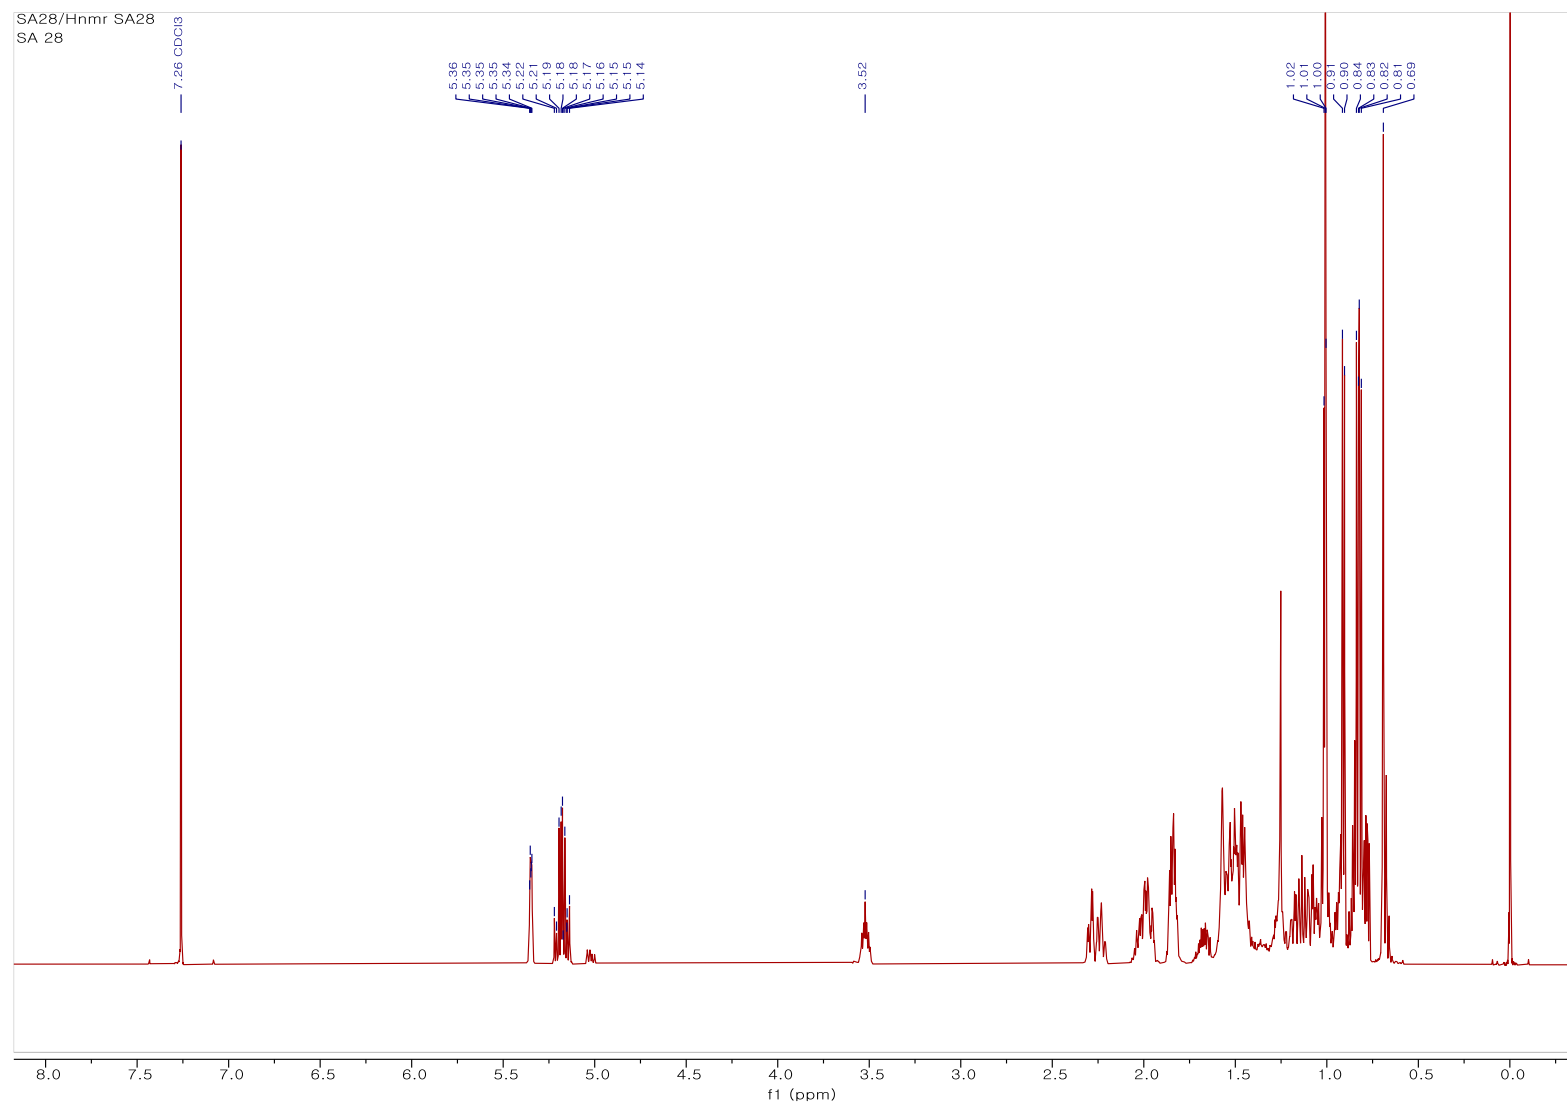

**Figure S26.** <sup>1</sup>H NMR spectrum of compound **10** in chloroform-*d* (600 MHz).

**Table S1.** Cytotoxicity of compounds **3** against HCT116 cells.

| Compound                                                                                                                                                                                                                                                                                    | IC <sub>50</sub> (μM) <sup>a</sup> |
|---------------------------------------------------------------------------------------------------------------------------------------------------------------------------------------------------------------------------------------------------------------------------------------------|------------------------------------|
| <b>3</b>                                                                                                                                                                                                                                                                                    | 3.76 ± 0.03                        |
| <sup>a</sup> IC <sub>50</sub> value of each compound was defined as the concentration (μM) that caused 50% inhibition of NO production in LPS-activated RAW264.7 mouse macrophages. The results are the averages of three independent experiments, and the data are expressed as mean ± SD. |                                    |

**Table S2.** NO inhibition of compounds **3** against LPS-induced RAW264.7 cells.

| Compound                                                                                                                                                                                                                                                                                    | IC <sub>50</sub> (μM) <sup>a</sup> |
|---------------------------------------------------------------------------------------------------------------------------------------------------------------------------------------------------------------------------------------------------------------------------------------------|------------------------------------|
| <b>3</b>                                                                                                                                                                                                                                                                                    | 22.82 ± 0.015                      |
| <sup>a</sup> IC <sub>50</sub> value of each compound was defined as the concentration (μM) that caused 50% inhibition of NO production in LPS-activated RAW264.7 mouse macrophages. The results are the averages of three independent experiments, and the data are expressed as mean ± SD. |                                    |
